# Supplementary material for: Molecular engineering of carbazole–acrylonitrile fluorophores: substituent-dependent optical properties and mechanochromism
Source: Royal Society of Chemistry journal article supplement (doi:10.1039/d1ce00012h), 2021-01-01

# **Molecular engineering of carbazole-acrylonitrile fluorophore: substituent-dependent optical properties and mechanochromism**

Pengfei Chen<sup>a</sup>, Yuanye Yin<sup>a</sup>, Yingyong Ni<sup>a</sup>, Huichao Zhu<sup>a</sup>, Jianyan Huang<sup>a</sup>, Jiaxiang Yang<sup>a</sup>, Jianjun Yang<sup>a\*</sup> and Lin Kong<sup>a\*</sup>

<sup>a</sup> College of Chemistry & Chemical Engineering, Anhui University, Anhui Province Key Laboratory of chemistry for Inorganic/Organic Hybrid Functional Materials, Hefei 230601, P. R. China.

Contents:

1. Synthetic and characterization of these compounds
2. Photophysical properties in aggregation and solid state.
3. The detailed crystal parameters.
4. Mechanochromism (MC) behavior in solid state.
5. <sup>1</sup>H and <sup>13</sup>C NMR spectra of the eight target products.

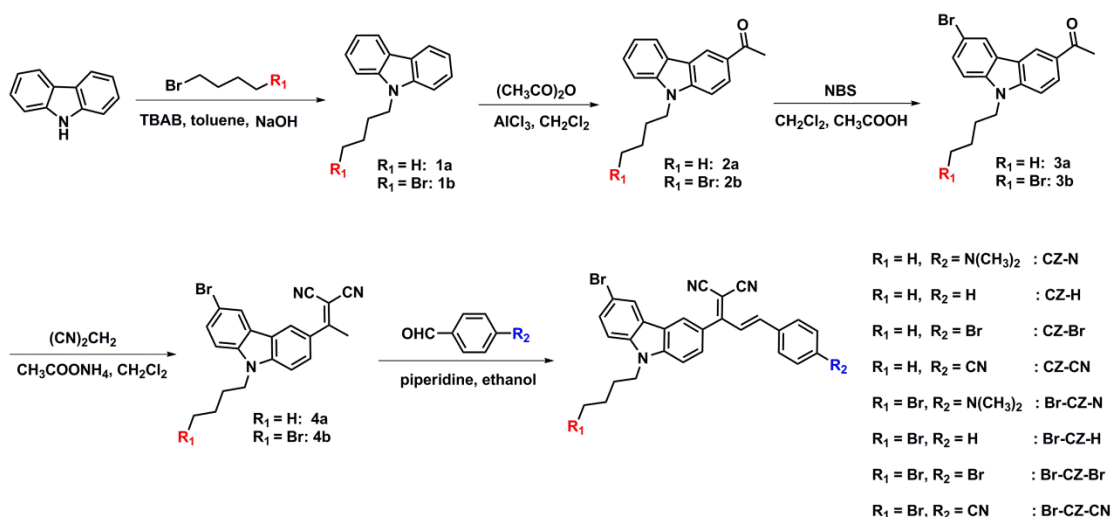

### Characterization:

**1a:** Carbazole (16.7 g, 100 mmol) and NaOH (5.59 g, 150 mmol) were dissolved in 100 mL acetone. *n*-Butyl bromide (12 mL, 100 mmol) and 0.15 g TBAB were added to the above mixture. The mixture was refluxed for 4 h, then the solvent was evaporated to dryness and the residue was added to 200 mL of water to get precipitation. The solid was filtered out, and the residue was washed with a large amount of water and recrystallized with ethanol/water at 50 °C. After drying, a white needle-like solid was obtained (18.2 g). Go directly to the next step.

**1b:** Similar to **1a**, except that 1,4-dibromobutane was required a large excess (the stoichiometric ratio of carbazole and 1,4-dibromobutane is 1:8), and obtained white powder (yield: 67%). <sup>1</sup>H NMR (400 MHz, CDCl<sub>3</sub>)  $\delta$ : 1.87-1.94 (m, 2H), 2.02-2.09 (m, 2H), 3.37 (t, 2H, *J* = 6.84 Hz), 4.34 (t, 2H, *J* = 6.96 Hz), 7.21-7.25 (m, 2H), 7.39 (d, 2H, *J* = 8.16 Hz), 7.44-7.48 (m, 2H), 8.09 (d, 2H, *J* = 7.76 Hz).

**2a:** **1a** was added into the anhydrous CH<sub>2</sub>Cl<sub>2</sub> (30 mL) under ice-bath. Then the anhydrous AlCl<sub>3</sub> (2.65 g, 19.85 mmol) was quickly added. 5 min later, the acetic anhydride (1.11 g, 10.92 mmol) was dropped into the above mixture and stirred at room temperature overnight. The crude product was washed by water and extracted by CH<sub>2</sub>Cl<sub>2</sub>, then dried with anhydrous Na<sub>2</sub>SO<sub>4</sub>. After that, the solvent was removed under reduced pressure and the residue was purified by silica gel with CH<sub>2</sub>Cl<sub>2</sub>/petroleum ether (1/2, v/v) as eluent. The pure product was a white solid (16.20 g, yield: 75%).

**2b:** Similar to **2a**. White powder (yield: 65%).  $^1\text{H}$  NMR (400 MHz,  $\text{CDCl}_3$ )  $\delta$ : 1.89-1.96 (m, 2H), 2.05-2.12 (m, 2H), 2.73 (s, 3H), 3.39 (t, 2H,  $J = 6.84$  Hz), 4.39 (t, 2H,  $J = 6.96$  Hz), 7.32 (t, 1H,  $J = 7.16$  Hz), 7.40-7.45 (m, 2H), 7.53 (t, 1H,  $J = 7.32$  Hz), 8.13 (d, 1H,  $J = 8.68$  Hz), 8.16 (d, 1H,  $J = 8.16$  Hz), 8.75 (s, 1H).

**3a:** **2a** (2.00 g, 7.54 mmol) and *N*-bromosuccinimide (1.74 g, 9.80 mmol) were dissolved in 40 mL chloroform/acetic acid (1/1, v/v), and stirred at room temperature for 20 h. The reactant was dropped into 200 mL water and the pH value was adjusted to neutral by NaOH aqueous solution. After that, the crude product was extracted by  $\text{CH}_2\text{Cl}_2$  and dried with anhydrous  $\text{Na}_2\text{SO}_4$ . The solvent was removed under reduced pressure and the residue was purified by silica gel with  $\text{CH}_2\text{Cl}_2$ /petroleum ether (1/2, v/v) as eluent. The pure product was a white solid (1.95 g, yield: 75%).  $^1\text{H}$  NMR (400 MHz,  $\text{CDCl}_3$ )  $\delta$ : 0.94 (t,  $J = 7.28$  Hz, 3H), 1.32-1.42 (m, 2H), 1.80-1.88 (m, 2H), 2.72 (s, 3H), 4.30 (t,  $J = 7.12$  Hz, 2H), 7.31 (d,  $J = 8.68$  Hz, 1H), 7.40 (d,  $J = 8.72$  Hz, 1H), 7.58 (dd,  $J_1 = 8.64$  Hz,  $J_2 = 1.88$  Hz, 1H), 8.14 (dd,  $J_1 = 8.68$  Hz,  $J_2 = 1.56$  Hz, 1H), 8.26 (d,  $J = 1.88$  Hz, 1H), 8.67 (d,  $J = 1.56$  Hz, 1H).

**3b:** Similar to **3a**. White powder (yield: 61%).  $^1\text{H}$  NMR (400 MHz,  $\text{CDCl}_3$ )  $\delta$ : 1.87-1.94 (m, 2H), 2.03-2.10 (m, 2H), 2.72 (s, 3H), 3.39 (t, 2H,  $J = 6.36$  Hz), 4.36 (t, 2H,  $J = 7.08$  Hz), 7.32 (d, 1H,  $J = 8.68$  Hz), 7.42 (d, 1H,  $J = 8.68$  Hz), 7.60 (dd, 1H,  $J_1 = 8.64$  Hz,  $J_2 = 1.88$  Hz), 8.16 (d, 1H,  $J = 8.68$  Hz), 8.27 (s, 1H), 8.68 (s, 1H).

**4a:** **3a** (1.50 g, 4.37 mmol), malononitrile (0.375 g, 5.68 mmol) and ammonium acetate (0.438 g 5.68 mmol) were dissolved in 18 mL  $\text{CH}_2\text{Cl}_2$ /MeOH (2/1, v/v), and stirred at room temperature for 20 h. The crude product was purified by silica gel with  $\text{CH}_2\text{Cl}_2$ /petroleum ether (1/4, v/v) as eluent. The pure product was a white solid (0.95 g, yield: 56%).  $^1\text{H}$  NMR (600 MHz,  $\text{CDCl}_3$ )  $\delta$ : 0.96 (t,  $J = 7.38$  Hz, 3H), 1.35-1.42 (m, 2H), 1.82-1.87 (m, 2H), 2.75 (s, 3H), 4.28 (t,  $J = 7.20$  Hz, 2H), 7.31 (d,  $J = 8.70$  Hz, 1H), 7.45 (d,  $J = 8.70$  Hz, 1H), 7.60 (d,  $J = 8.70$  Hz, 1H), 7.80 (d,  $J = 8.70$  Hz, 1H), 8.23 (s, 1H), 8.32 (s, 1H).

**4b:** Similar to **4a**. Primrose-yellow powder (yield: 53%).  $^1\text{H}$  NMR (400 MHz,  $\text{CDCl}_3$ )  $\delta$ : 1.88-1.95 (m, 2H), 2.03-2.11 (m, 2H), 2.77 (s, 3H), 3.40 (t, 2H,  $J = 6.32$  Hz), 4.36 (t, 2H,  $J = 7.12$  Hz), 7.33 (d, 1H,  $J = 8.68$  Hz), 7.47 (d, 1H,  $J = 8.68$  Hz),

7.63 (d, 1H,  $J_1 = 8.72$  Hz,  $J_2 = 1.88$  Hz), 7.81 (d, 1H,  $J = 8.72$  Hz), 8.25 (s, 1H), 8.34 (s, 1H).  $^{13}\text{C}$  NMR (100 MHz,  $\text{CDCl}_3$ )  $\delta$ : 24.3, 27.5, 30.0, 32.7, 42.7, 81.8, 109.3, 110.7, 113.4, 113.6, 114.1, 121.1, 122.2, 123.6, 124.3, 126.3, 126.8, 129.9, 139.6, 142.6, 174.8.

**CZ-N: 4a** (0.30 g, 0.74 mmol) and 4-(dimethylamino)benzaldehyde (0.14 g, 0.96 mmol) were dissolved in ethanol (15 mL), then the catalytic amount of piperidine was added. The reaction mixture was refluxed for 3 h. The solvent was evaporated under reduced pressure. The crude product was purified by chromatography on silica gel with  $\text{CH}_2\text{Cl}_2$  and petroleum ether (1/1, v/v) as the eluent to afford pure **CZ-N** as a red powder 174 mg (yield: 44%). m. p. 254.0-265.4 °C. FT-IR (KBr,  $\text{cm}^{-1}$ ): 2216, 1578, 1530, 1472, 1357, 1289, 1167, 969, 815.  $^1\text{H}$  NMR (400 MHz,  $\text{CDCl}_3$ )  $\delta$ : 0.89 (t,  $J = 7.32$  Hz, 3H), 1.39-1.49 (m, 2H), 1.85-1.92 (m, 2H), 3.07 (s, 6H), 4.32 (t,  $J = 7.16$  Hz, 2H), 6.63 (d,  $J = 8.92$  Hz, 2H), 6.87 (d,  $J = 15.16$  Hz, 1H), 7.32 (d,  $J = 8.68$  Hz, 1H), 7.42 (d,  $J = 8.92$  Hz, 2H), 7.46 (d,  $J = 15.16$  Hz, 1H), 7.51 (m, 2H), 7.58 (dd,  $J_1 = 8.68$  Hz,  $J_2 = 1.92$  Hz, 1H), 8.06 (s, 1H), 8.17 (d,  $J = 1.76$  Hz, 1H).  $^{13}\text{C}$  NMR (100 MHz,  $\text{CDCl}_3$ )  $\delta$ : 13.9, 20.6, 31.1, 40.1, 43.3, 109.2, 110.6, 111.8, 112.5, 114.6, 115.4, 119.8, 121.8, 122.2, 122.5, 123.5, 124.2, 124.6, 127.6, 129.2, 131.3, 139.6, 142.0, 150.3, 152.7, 172.3. MS (APCI) m/z: calcd for  $\text{C}_{30}\text{H}_{27}\text{N}_4\text{Br}$ : 522.14, found 523.15 [ $\text{M} + \text{H}$ ] $^+$ .

**CZ-H**: Similar to **CZ-N**. Yellow powder (yield: 48%). m. p. 221.5-224.3 °C. FT-IR (KBr,  $\text{cm}^{-1}$ ): 2220, 1607, 1530, 1470, 1444, 1350, 1287, 1281, 1149, 971, 800.  $^1\text{H}$  NMR (400 MHz,  $\text{CDCl}_3$ )  $\delta$ : 0.99 (t,  $J = 7.28$  Hz, 3H), 1.40-1.51 (m, 2H), 1.85-1.93 (m, 2H), 4.33 (t,  $J = 7.20$  Hz, 2H), 6.97 (d,  $J = 15.52$  Hz, 1H), 7.34-7.45 (m, 4H), 7.52-7.62 (m, 5H), 7.67 (d,  $J = 15.52$  Hz, 1H), 8.11 (s, 1H), 8.22 (s, 1H).  $^{13}\text{C}$  NMR (100 MHz,  $\text{CDCl}_3$ )  $\delta$ : 13.9, 20.6, 31.1, 43.4, 81.0, 109.5, 110.8, 112.8, 113.5, 114.3, 122.0, 122.4, 123.5, 123.8, 124.1, 125.4, 127.6, 128.8, 129.2, 129.5, 131.5, 134.5, 139.7, 142.3, 149.3, 171.8. MS (APCI) m/z calcd for  $\text{C}_{28}\text{H}_{22}\text{N}_3\text{Br}$ : 479.10, found 480.10 [ $\text{M} + \text{H}$ ] $^+$ .

**CZ-Br**: Similar to **CZ-N**. Yellow powder (yield: 62%). m. p. 208.1-212.2 °C. FT-IR (KBr,  $\text{cm}^{-1}$ ): 2220, 1607, 1585, 1522, 1486, 1441, 1332, 1218, 1150, 1006, 977, 800.  $^1\text{H}$  NMR (400 MHz,  $\text{CDCl}_3$ )  $\delta$ : 0.99 (t,  $J = 7.32$  Hz, 3H), 1.39-1.48 (m, 2H), 1.85-1.93 (m, 2H), 4.33 (t,  $J = 7.20$  Hz, 2H), 6.89 (d,  $J = 15.56$  Hz, 1H), 7.34-7.40 (m, 3H), 7.53-7.55 (m, 4H), 7.60 (dd,  $J_1 = 8.68$  Hz,  $J_2 = 1.84$  Hz, 1H), 7.64 (d,  $J = 15.56$

Hz, 1H), 8.09 (s, 1H), 8.22 (d,  $J = 1.76$  Hz, 1H).  $^{13}\text{C}$  NMR (100 MHz,  $\text{CDCl}_3$ )  $\delta$ : 13.9, 20.6, 31.1, 43.4, 81.5, 109.5, 110.8, 112.8, 112.9, 113.4, 114.2, 122.1, 122.3, 123.5, 124.1, 125.9, 126.0, 127.5, 129.6, 130.0, 132.5, 133.4, 139.7, 142.3, 147.7, 171.4. MS (APCI)  $m/z$  calcd for  $\text{C}_{28}\text{H}_{21}\text{N}_3\text{Br}_2$ : 557.01, found 559.02  $[\text{M} + 2\text{H}]^+$ .

**CZ-CN**: Similar to **CZ-N**. Bright-yellow powder (yield: 37%). m. p. 254.6-258.3 °C. FT-IR (KBr,  $\text{cm}^{-1}$ ): 2220, 1607, 1596, 1522, 1481, 1441, 1338, 1212, 1155, 1069, 960, 830.  $^1\text{H}$  NMR (400 MHz,  $\text{CDCl}_3$ )  $\delta$ : 0.99 (t,  $J = 7.28$  Hz, 3H), 1.40-1.50 (m, 2H), 1.86-1.93 (m, 2H), 4.34 (t,  $J = 7.16$  Hz, 2H), 6.95 (d,  $J = 15.60$  Hz, 1H), 7.35 (d,  $J = 8.76$  Hz, 1H), 7.55-7.70 (m, 7H), 7.76 (d,  $J = 15.60$  Hz, 1H), 8.11 (s, 1H), 8.22 (s, 1H).  $^{13}\text{C}$  NMR (100 MHz,  $\text{CDCl}_3$ )  $\delta$ : 13.9, 20.6, 31.1, 43.4, 83.1, 109.6, 110.9, 113.0, 113.1, 113.8, 114.2, 118.1, 122.2, 122.3, 123.2, 123.5, 124.0, 127.4, 128.5, 128.9, 129.7, 132.8, 138.5, 139.8, 142.4, 146.1, 170.6. MS (APCI)  $m/z$  calcd for  $\text{C}_{29}\text{H}_{21}\text{N}_4\text{Br}$ : 504.10, found 505.10  $[\text{M} + \text{H}]^+$ .

**Br-CZ-N**: Similar to **CZ-N**. Red powder (yield: 45%). m. p. 232.0-241.7 °C. FT-IR (KBr,  $\text{cm}^{-1}$ ): 2210, 1607, 1521, 1460, 1351, 1165, 1091, 976, 806.  $^1\text{H}$  NMR (400 MHz,  $\text{CDCl}_3$ )  $\delta$ : 1.93-2.00 (m, 2H), 2.06-2.13 (m, 2H), 3.07 (s, 6H), 3.43 (t, 2H,  $J = 6.28$  Hz), 4.37 (t, 2H,  $J = 6.92$  Hz), 6.64 (d, 2H,  $J = 8.72$  Hz), 6.88 (d, 1H,  $J = 15.12$  Hz), 7.33 (d, 1H,  $J = 8.68$  Hz), 7.41-7.51 (m, 5H), 7.60 (d, 1H,  $J = 8.82$  Hz), 8.07 (s, 1H), 8.22 (s, 1H).  $^{13}\text{C}$  NMR (100 MHz,  $\text{CDCl}_3$ )  $\delta$ : 27.6, 30.1, 32.8, 40.1, 42.7, 109.1, 110.5, 111.9, 112.8, 114.5, 115.3, 119.9, 122.0, 122.2, 122.5, 123.6, 124.3, 125.0, 127.7, 129.4, 131.3, 131.5, 139.5, 141.8, 150.2, 152.8, 172.1. MALDI-TOF calcd for  $\text{C}_{30}\text{H}_{26}\text{Br}_2\text{N}_4$ , 602.05, found, 602.22.

**Br-CZ-H**: Similar to **CZ-N**. Yellow powder (yield: 39%). m. p. 205.3-209.4 °C. FT-IR (KBr,  $\text{cm}^{-1}$ ): 2213, 1608, 1592, 1502, 1481, 1448, 1383, 1351, 1334, 1204, 1156, 873, 803, 765, 695.  $^1\text{H}$  NMR (400 MHz,  $\text{CDCl}_3$ )  $\delta$ : 1.93-2.00 (m, 2H), 2.07-2.15 (m, 2H), 3.43 (t, 2H,  $J = 6.32$  Hz), 4.39 (t, 2H,  $J = 6.96$  Hz), 6.98 (d, 1H,  $J = 15.56$  Hz), 7.35 (d, 1H,  $J = 8.68$  Hz), 7.39-7.45 (m, 3H), 7.53-7.58 (m, 4H), 7.62 (d, 1H,  $J = 8.72$  Hz), 7.70 (d, 1H,  $J = 15.56$  Hz), 8.12 (s, 1H), 8.23 (s, 1H).  $^{13}\text{C}$  NMR (100 MHz,  $\text{CDCl}_3$ )  $\delta$ : 27.6, 30.1, 32.8, 42.7, 81.3, 109.4, 110.6, 113.1, 113.4, 114.2, 122.2, 112.4, 123.7, 124.1, 124.2, 125.4, 127.7, 128.8, 129.2, 129.7, 131.6, 134.5, 139.6, 142.1, 149.3, 171.7. MALDI-TOF calcd for  $\text{C}_{28}\text{H}_{21}\text{Br}_2\text{N}_3$ , 559.01, found,

559.57.

**Br-CZ-Br:** Similar to **CZ-N**. Orange powder (yield: 60%). m. p. 201.8-214.5 °C. FT-IR (KBr,  $\text{cm}^{-1}$ ): 2220, 1613, 1585, 1506, 1478, 1444, 1399, 1348, 1332, 1287, 1230, 1157, 1073, 1011, 983, 867, 800.  $^1\text{H}$  NMR (400 MHz,  $\text{CDCl}_3$ )  $\delta$ : 1.93-2.00 (m, 2H), 2.07-2.14 (m, 2H), 3.43 (t, 2H,  $J = 6.28$  Hz), 4.39 (t, 2H,  $J = 7.00$  Hz), 6.90 (d, 1H,  $J = 15.56$  Hz), 7.34-7.40 (m, 3H), 7.53-7.55 (m, 4H), 7.63 (d, 1H,  $J = 8.72$  Hz), 7.67 (d, 1H,  $J = 15.56$  Hz), 8.10 (s, 1H), 8.23 (s, 1H).  $^{13}\text{C}$  NMR (100 MHz,  $\text{CDCl}_3$ )  $\delta$ : 27.6, 30.0, 32.8, 42.7, 81.8, 109.4, 110.6, 113.1, 113.3, 114.1, 122.2, 122.3, 123.7, 123.8, 124.2, 125.9, 126.1, 127.6, 129.8, 130.0, 132.5, 133.4, 139.6, 142.1, 147.7, 171.3. MALDI-TOF calcd for  $\text{C}_{28}\text{H}_{20}\text{Br}_3\text{N}_3$ , 636.92, found, 636.19.

**Br-CZ-CN:** Similar to **CZ-N**. Bright-yellow powder (yield: 44%). m. p. 212.7-217.3 °C. FT-IR (KBr,  $\text{cm}^{-1}$ ): 2219, 1617, 1591, 1511, 1482, 1437, 1373, 1328, 1287, 1226, 1181, 1155, 1024, 979, 874, 825, 560.  $^1\text{H}$  NMR (400 MHz,  $\text{CDCl}_3$ )  $\delta$ : 1.93-2.00 (m, 2H), 2.07-2.15 (m, 2H), 3.44 (t, 2H,  $J = 6.28$  Hz), 4.39 (t, 2H,  $J = 7.20$  Hz), 6.96 (d, 1H,  $J = 15.52$  Hz), 7.36 (d, 1H,  $J = 8.68$  Hz), 7.61-7.65 (m, 3H), 7.69 (d, 2H,  $J = 8.36$  Hz), 7.74 (d, 1H,  $J = 15.52$  Hz), 8.11 (s, 1H), 8.22 (s, 1H).  $^{13}\text{C}$  NMR (100 MHz,  $\text{CDCl}_3$ )  $\delta$ : 27.6, 30.1, 32.9, 42.8, 109.6, 110.8, 113.0, 113.3, 113.8, 114.3, 118.2, 122.4, 123.5, 123.7, 124.2, 127.6, 128.5, 128.9, 130.0, 132.9, 138.6, 139.7, 142.3, 146.2, 170.6. MALDI-TOF calcd for  $\text{C}_{29}\text{H}_{20}\text{Br}_2\text{N}_4$ , 584.01, found, 584.31.

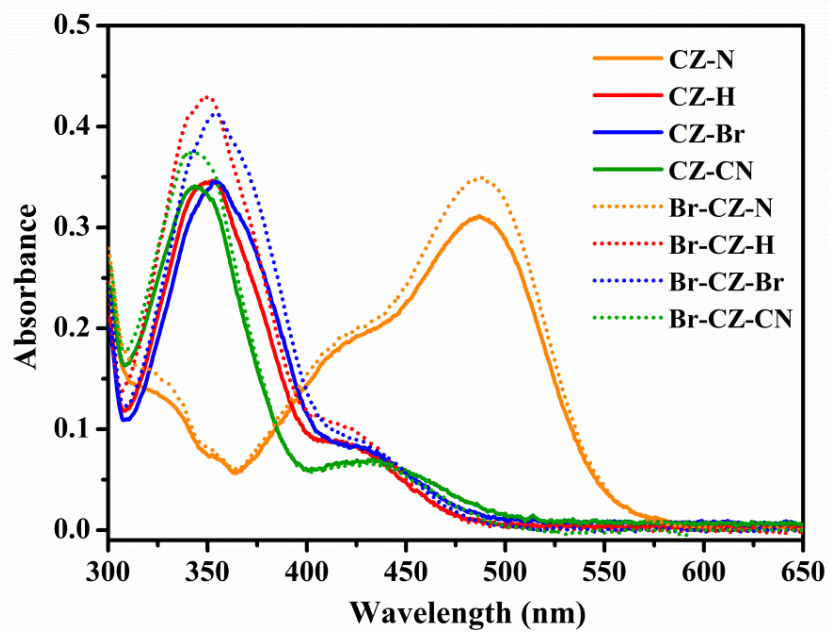

Fig. S1 The UV-vis absorption spectra of these compounds in THF ( $1.0 \times 10^{-5}$  M).

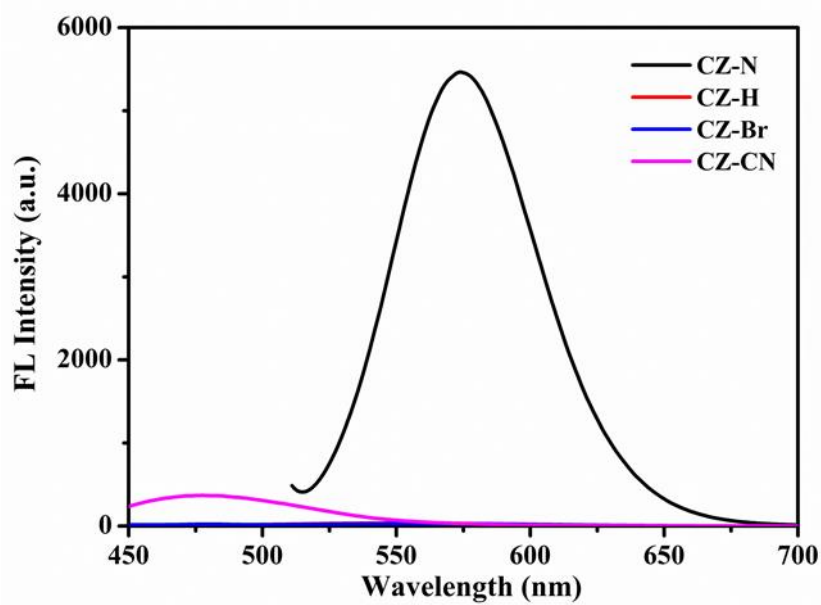

Fig. S2 The fluorescence spectra of the compounds CZ-N ~ CZ-CN in THF ( $1.0 \times 10^{-5}$  M).

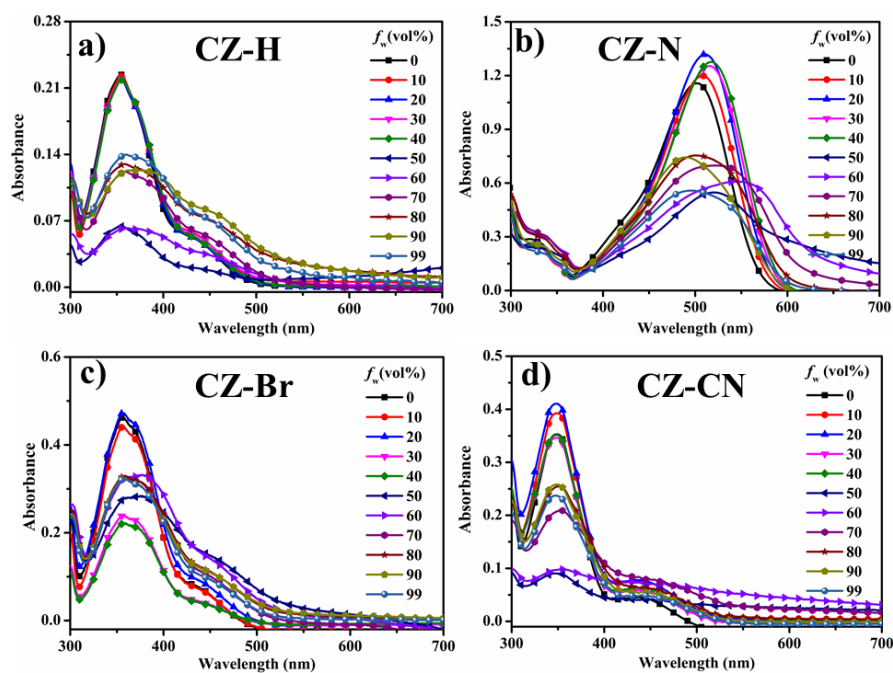

**Fig. S3** The UV-vis absorption spectra of compounds **CZ-H**, **CZ-N**, **CZ-Br**, and **CZ-CN** in the DMF/H<sub>2</sub>O system with different water fraction.

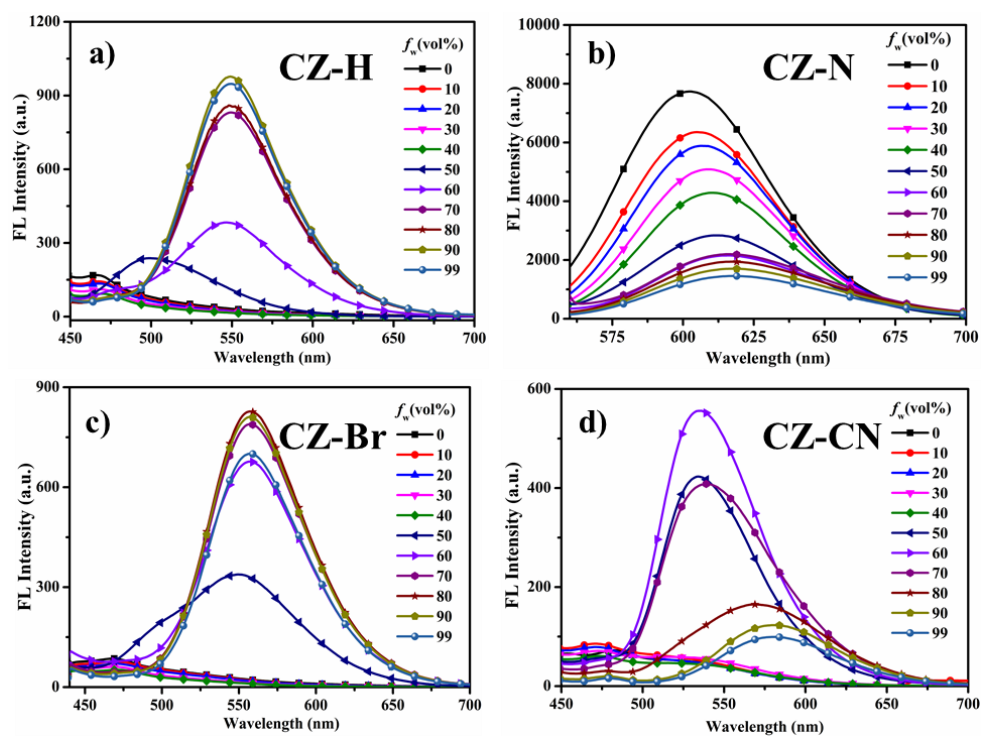

**Fig. S4** The fluorescence spectra of compounds **CZ-H**, **CZ-N**, **CZ-Br**, and **CZ-CN** in the DMF/H<sub>2</sub>O system with different water fraction.



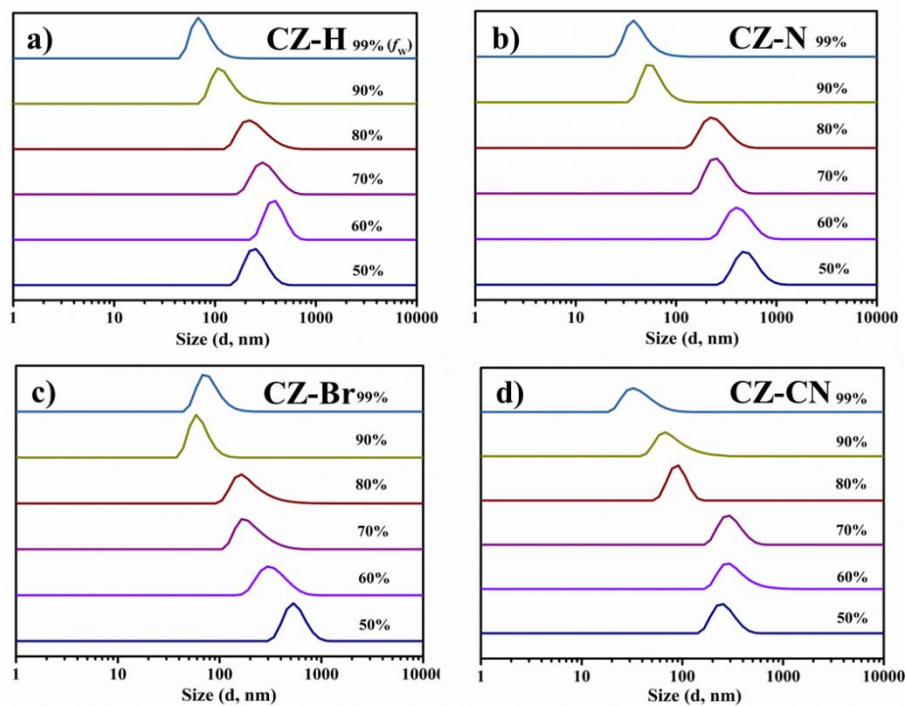

**Fig. S5** The dynamic light scattering of compounds **CZ-H**, **CZ-N**, **CZ-Br**, and **CZ-CN** in the DMF/H<sub>2</sub>O system with different water fraction.

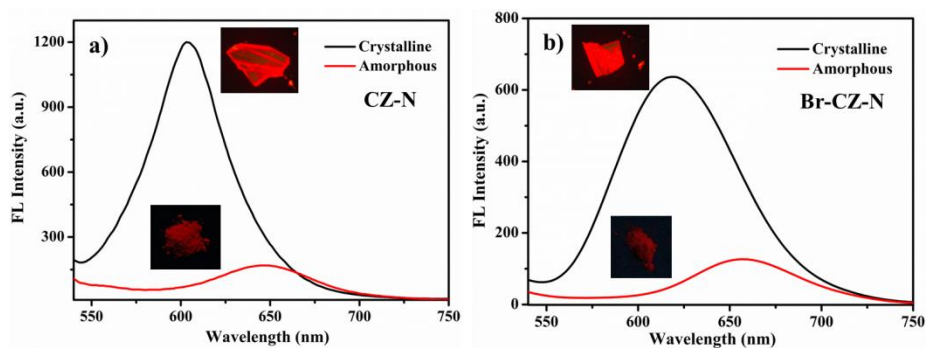

**Fig. S6** The fluorescence spectra of **CZ-N** (a) and **Br-CZ-N** (b) in the crystalline state and amorphous state. Inset: the photographs in the crystalline state and amorphous state under the 365 nm UV lamp.

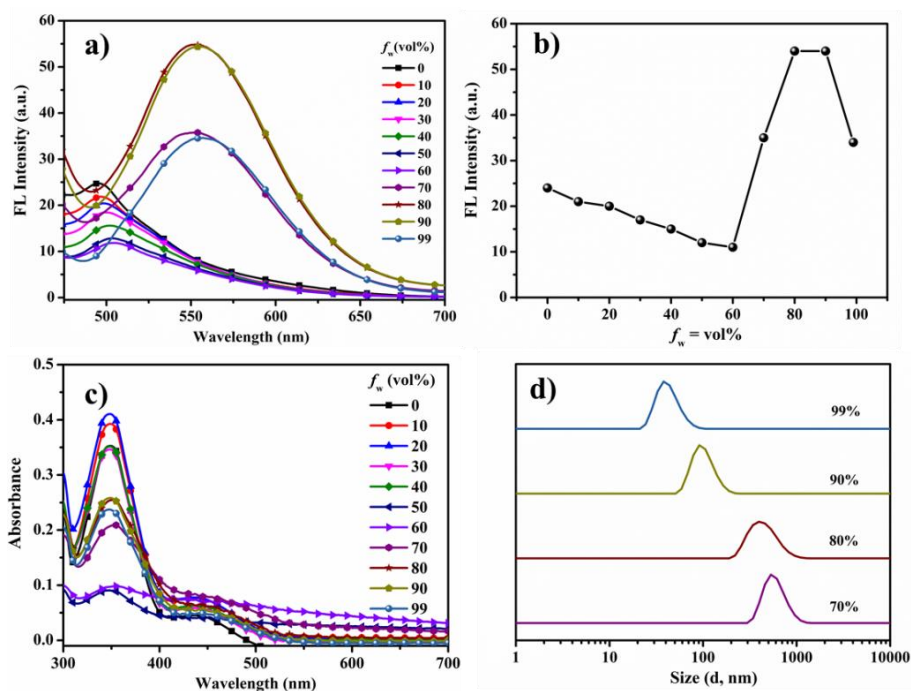

**Fig. S7** The photophysical properties of compound **Br-CZ-H** in the DMF/H<sub>2</sub>O system with different water fraction. The fluorescence spectra (a), the plots of fluorescence intensity vs. water fraction (b), the UV-vis absorption spectra (c), and the dynamic light scattering (d).

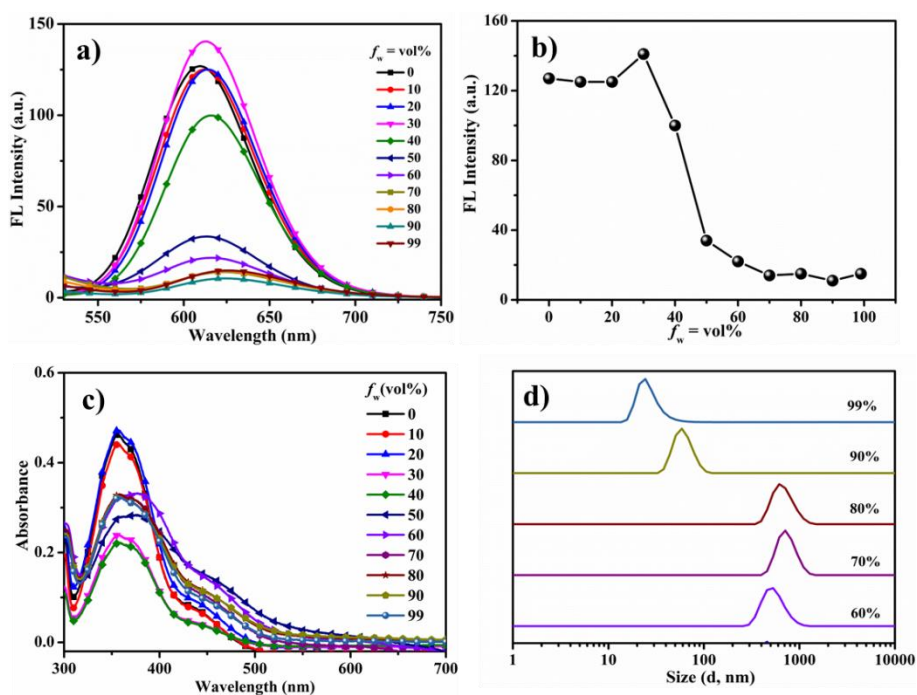

**Fig. S8** The photophysical properties of compound **Br-CZ-N** in the DMF/H<sub>2</sub>O system with different water fraction. The fluorescence spectra (a), the plots of fluorescence intensity vs. water fraction (b), the UV-vis absorption spectra (c), and the dynamic light scattering (d).

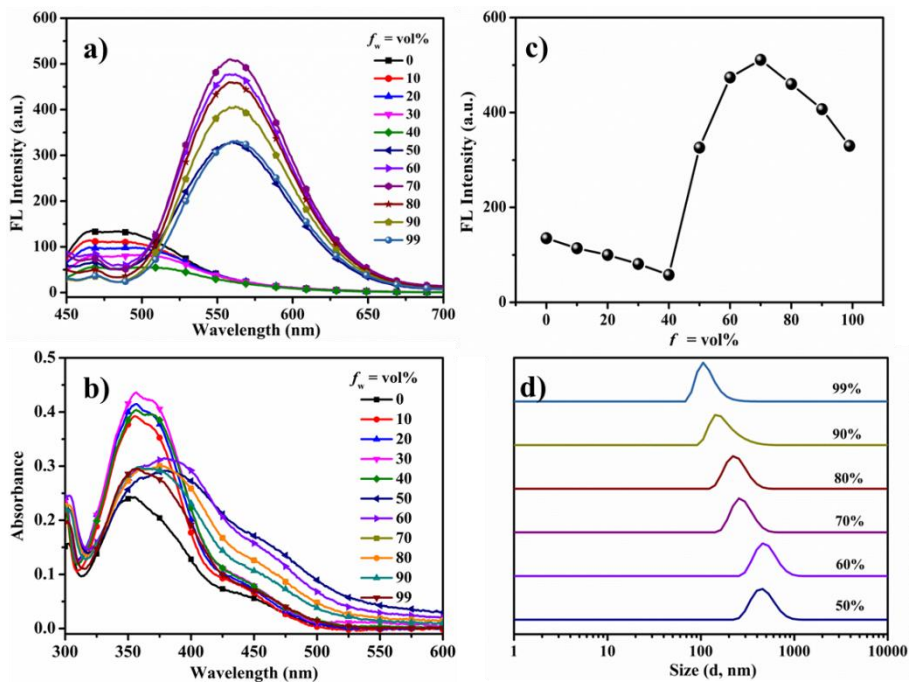

**Fig. S9** The photophysical properties of compound **Br-CZ-Br** in the DMF/H<sub>2</sub>O system with different water fraction. The fluorescence spectra (a), the plots of fluorescence intensity vs. water fraction (b), the UV-vis absorption spectra (c), and the dynamic light scattering (d).

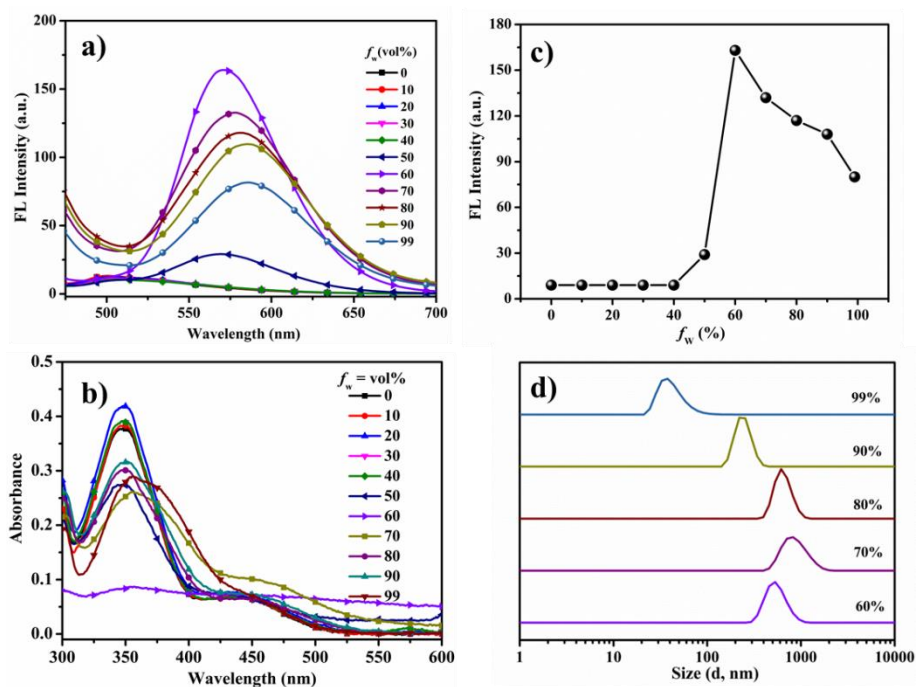

**Fig. S10** The photophysical properties of compound **Br-CZ-CN** in the DMF/H<sub>2</sub>O system with different water fraction. The fluorescence spectra (a), the plots of fluorescence intensity vs. water fraction (b), the UV-vis absorption spectra (c), and the dynamic light scattering (d).

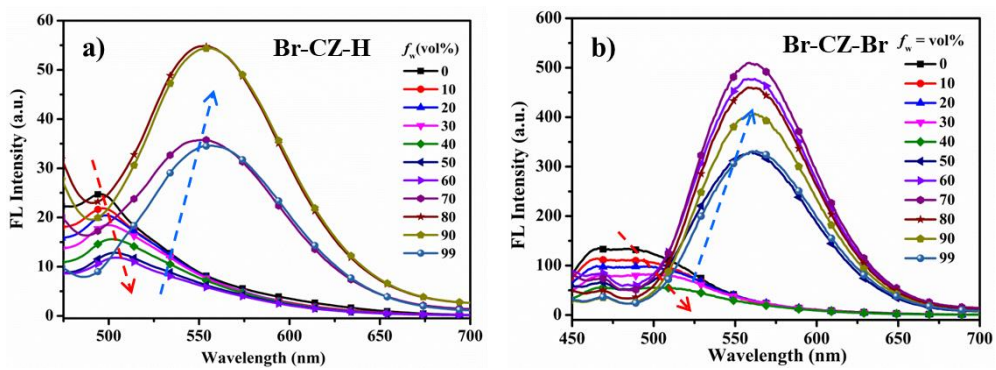

**Fig. S11** The fluorescence spectra of compound **Br-CZ-H** and **Br-CZ-Br** in the DMF/H<sub>2</sub>O system with different water fraction.

**Table S1** The crystallographic data and structure refinement details for **CZ-N**, **CZ-H**, **CZ-Br**, **Br-CZ-N**, and **Br-CZ-Br**.

| <b>Compound</b>                              | <b>CZ-N</b>                                                       | <b>CZ-H</b>                                                        | <b>CZ-Br</b>                                                      | <b>Br-CZ-N</b>                                                    | <b>Br-CZ-Br</b>                                                   |
|----------------------------------------------|-------------------------------------------------------------------|--------------------------------------------------------------------|-------------------------------------------------------------------|-------------------------------------------------------------------|-------------------------------------------------------------------|
| CCDC No:                                     | 1540851                                                           | 1541386                                                            | 1534287                                                           | 2015185                                                           | 2015186                                                           |
| formula                                      | C <sub>30</sub> H <sub>27</sub> BrN <sub>4</sub>                  | C <sub>28</sub> H <sub>22</sub> BrN <sub>3</sub>                   | C <sub>28</sub> H <sub>21</sub> Br <sub>2</sub> N <sub>3</sub>    | C <sub>30</sub> H <sub>26</sub> Br <sub>2</sub> N <sub>4</sub>    | C <sub>28</sub> H <sub>20</sub> Br <sub>3</sub> N <sub>3</sub>    |
| Weight<br>(M <sub>r</sub> )                  | 523.47                                                            | 480.39                                                             | 559.30                                                            | 602.37                                                            | 638.20                                                            |
| Crystal<br>system                            | Monoclinic                                                        | Monoclinic                                                         | Triclinic                                                         | Monoclinic                                                        | Triclinic                                                         |
| space group                                  | <i>P</i> 2 <sub>1</sub> / <i>c</i>                                | <i>P</i> 2 <sub>1</sub> / <i>c</i>                                 | <i>P</i> $\bar{1}$                                                | <i>P</i> 2 <sub>1</sub> / <i>c</i>                                | <i>P</i> $\bar{1}$                                                |
| <i>a</i> (Å)                                 | 17.509(9)                                                         | 16.251(3)                                                          | 8.0137(9)                                                         | 17.292(4)                                                         | 7.3087(4)                                                         |
| <i>b</i> (Å)                                 | 12.679(7)                                                         | 12.879(2)                                                          | 11.6967(13)                                                       | 13.172(3)                                                         | 11.5980(7)                                                        |
| <i>c</i> (Å)                                 | 12.592(7)                                                         | 12.557(2)                                                          | 13.9362(15)                                                       | 12.572(3)                                                         | 14.7149(8)                                                        |
| $\alpha$ (deg)                               | 90                                                                | 90                                                                 | 72.1240(10)                                                       | 90                                                                | 98.253(5)                                                         |
| $\beta$ (deg)                                | 105.956(7)                                                        | 111.379(2)                                                         | 81.6730(10)                                                       | 106.655(2)                                                        | 101.593(3)                                                        |
| $\gamma$ (deg)                               | 90                                                                | 90                                                                 | 78.3640(10)                                                       | 90                                                                | 100.037(5)                                                        |
| <i>V</i>                                     | 2688(2)                                                           | 2447.4(7)                                                          | 1212.9(2)                                                         | 2743.3(9)                                                         | 1210.18(12)                                                       |
| <i>Z</i>                                     | 4                                                                 | 4                                                                  | 2                                                                 | 4                                                                 | 1                                                                 |
| $\rho$ (calad)<br>(mg m <sup>-3</sup> )      | 1.294                                                             | 1.304                                                              | 1.531                                                             | 1.458                                                             | 1.751                                                             |
| reflns<br>collected                          | 18523                                                             | 17052                                                              | 8697                                                              | 18768                                                             | 10044                                                             |
| Goodness-o<br>f-fit on <i>F</i> <sup>2</sup> | 1.039                                                             | 1.070                                                              | 1.049                                                             | 1.104                                                             | 1.071                                                             |
| Final <i>R</i>                               | <i>R</i> <sub>1</sub> = 0.0701                                    | <i>R</i> <sub>1</sub> = 0.0779,                                    | <i>R</i> <sub>1</sub> = 0.0347                                    | <i>R</i> <sub>1</sub> = 0.0573                                    | <i>R</i> <sub>1</sub> = 0.0361                                    |
| [ <i>I</i> >2 $\sigma$ ( <i>I</i> )]         | <i>wR</i> <sub>2</sub> = 0.2071                                   | <i>wR</i> <sub>2</sub> = 0.2291                                    | <i>wR</i> <sub>2</sub> = 0.0873                                   | <i>wR</i> <sub>2</sub> = 0.1714                                   | <i>wR</i> <sub>2</sub> = 0.0887                                   |
| <i>R</i> indices<br>(all data)               | <i>R</i> <sub>1</sub> = 0.0933<br><i>wR</i> <sub>2</sub> = 0.2285 | <i>R</i> <sub>1</sub> = 0.1040,<br><i>wR</i> <sub>2</sub> = 0.2508 | <i>R</i> <sub>1</sub> = 0.0462<br><i>wR</i> <sub>2</sub> = 0.0932 | <i>R</i> <sub>1</sub> = 0.0861<br><i>wR</i> <sub>2</sub> = 0.1866 | <i>R</i> <sub>1</sub> = 0.0481<br><i>wR</i> <sub>2</sub> = 0.0940 |

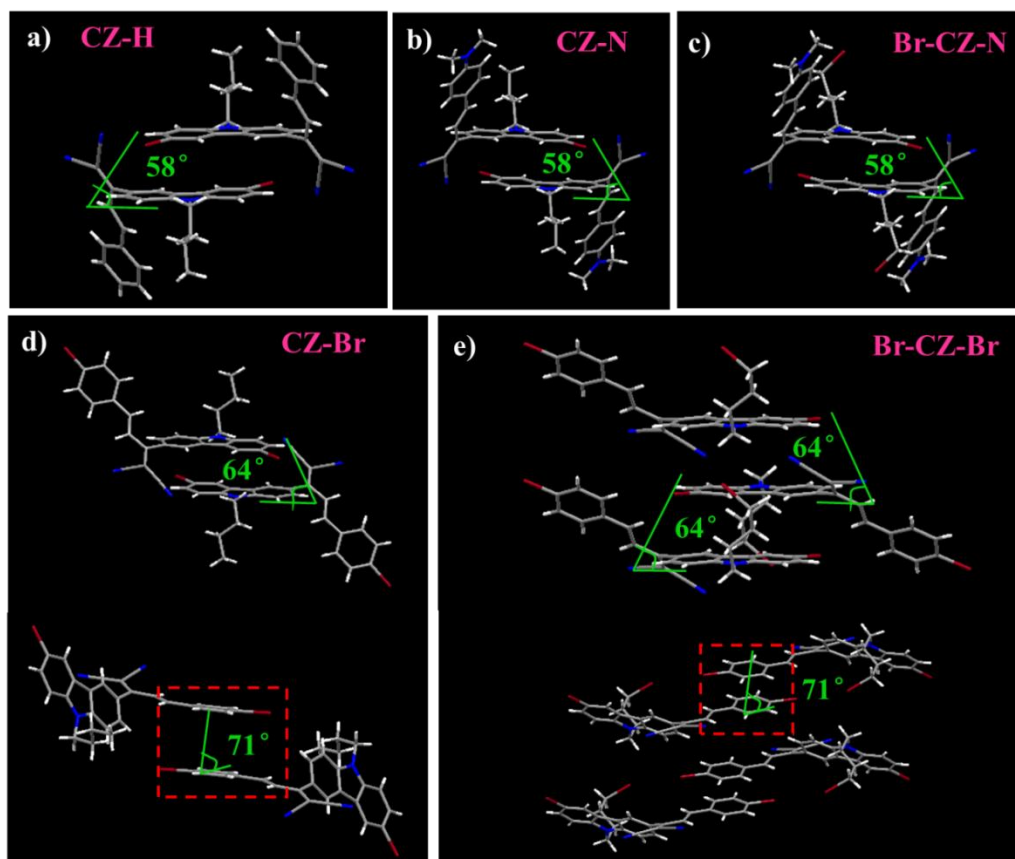

**Fig. S12** The space-filling model of these dimers.

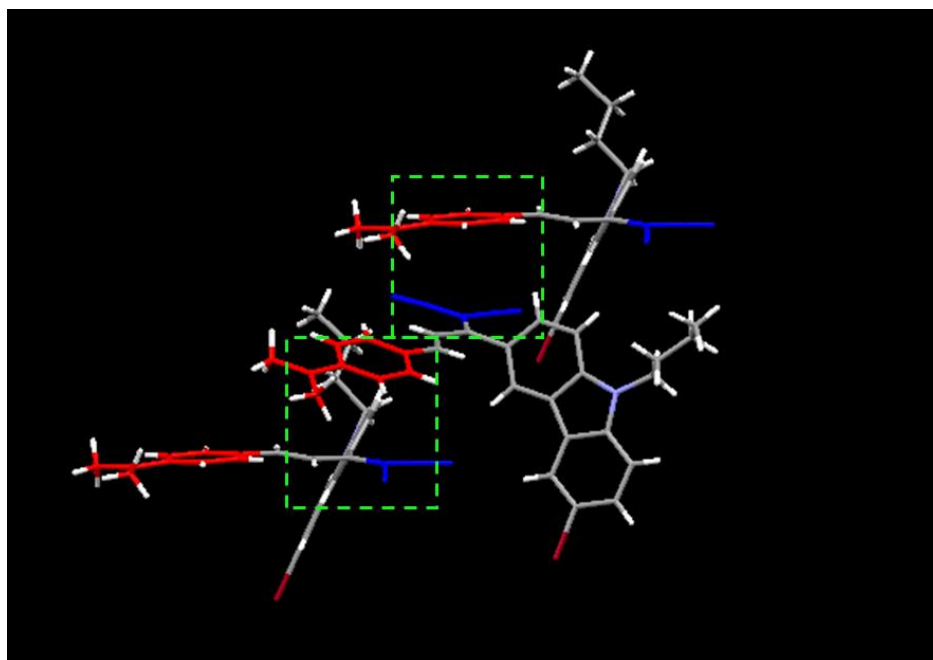

**Fig. S13** The D-A stacking model of CZ-N molecules.

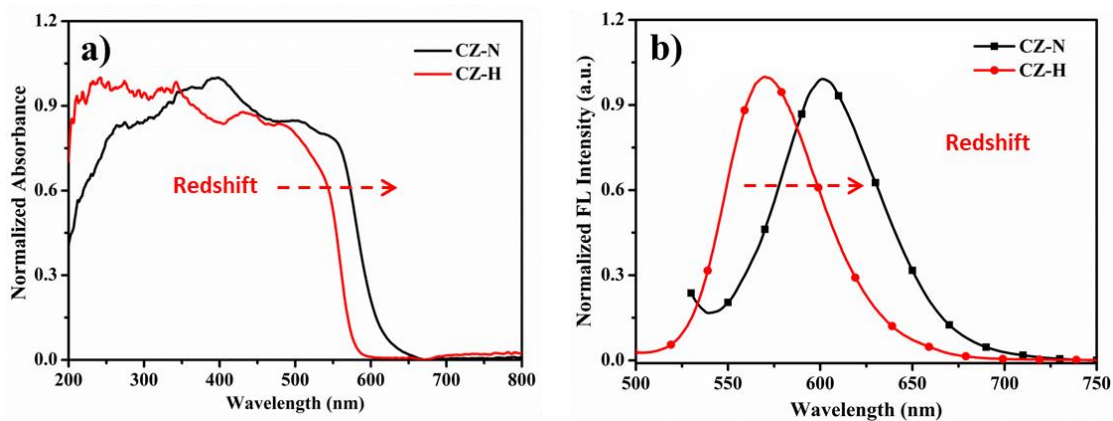

**Fig. S14** The absorption and emission spectra of **CZ-N** and **CZ-H** in the solid state.

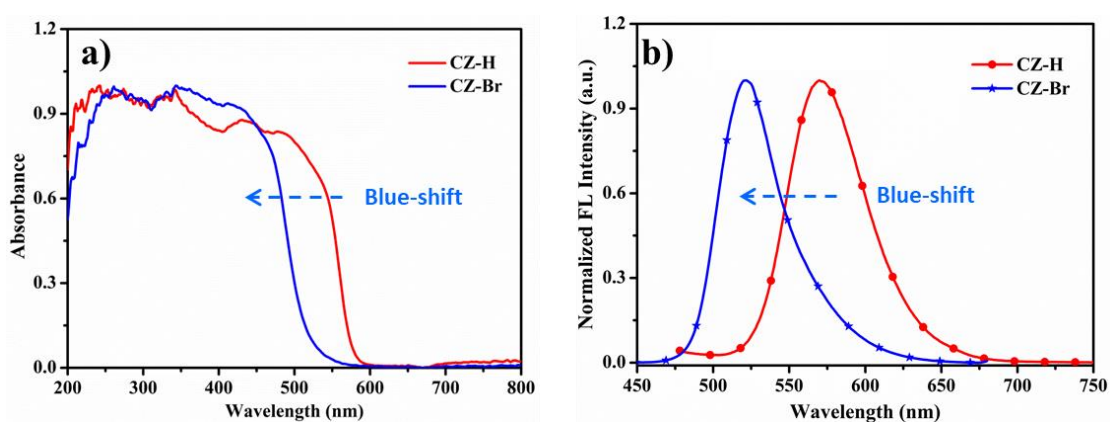

**Fig. S15** The absorption and emission spectra of **CZ-H** and **CZ-Br** in the solid state.

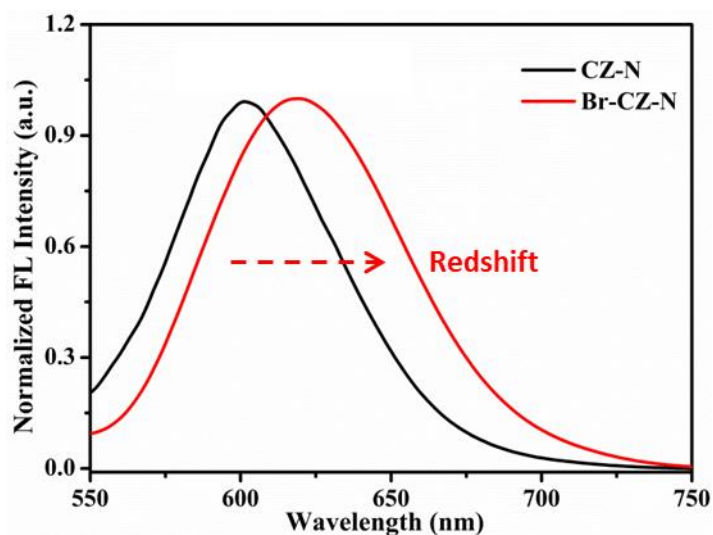

**Fig. S16** The fluorescence emission spectra of **CZ-N** and **Br-CZ-N** in the solid state.

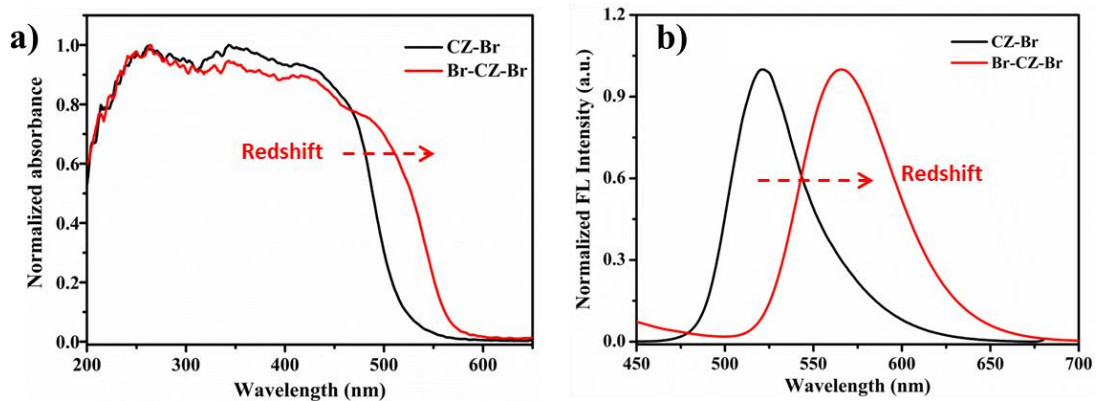

**Fig. S17** The absorption and emission spectra of CZ-Br and Br-CZ-Br in the solid state.

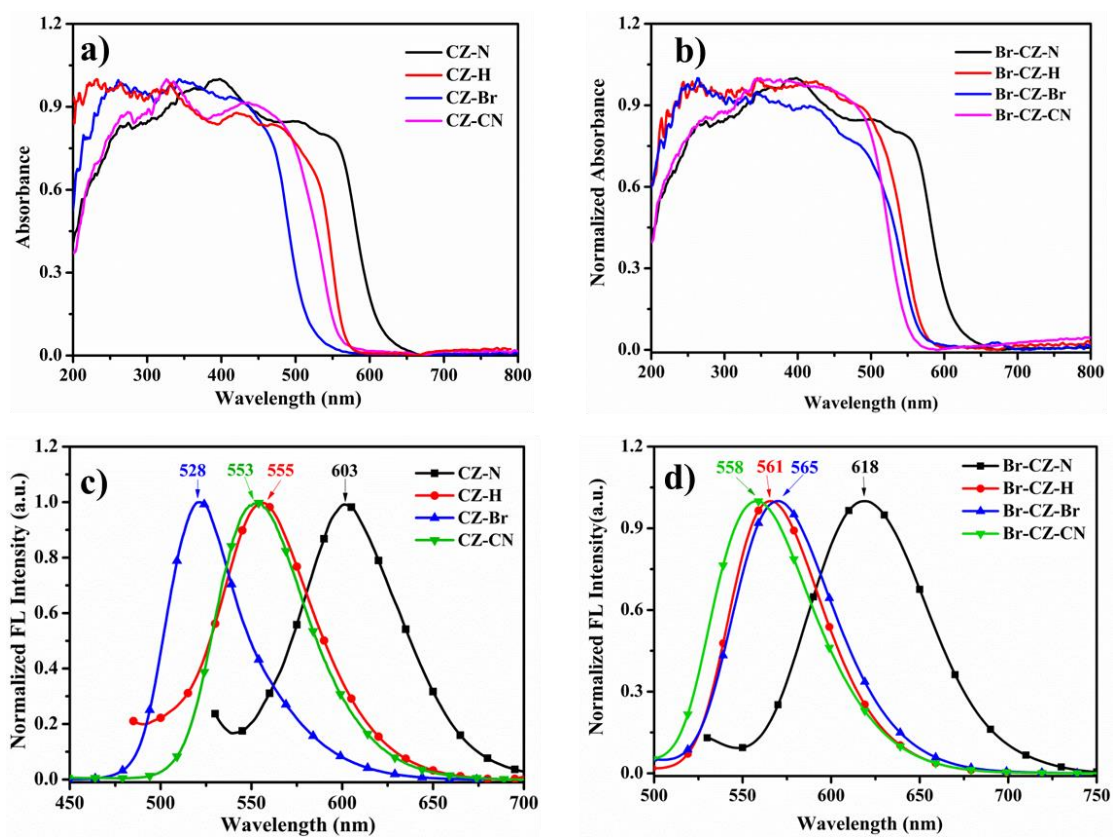

**Fig. S18** The absorption and emission spectra of CZ-N ~ Br-CZ-CN in the solid state.



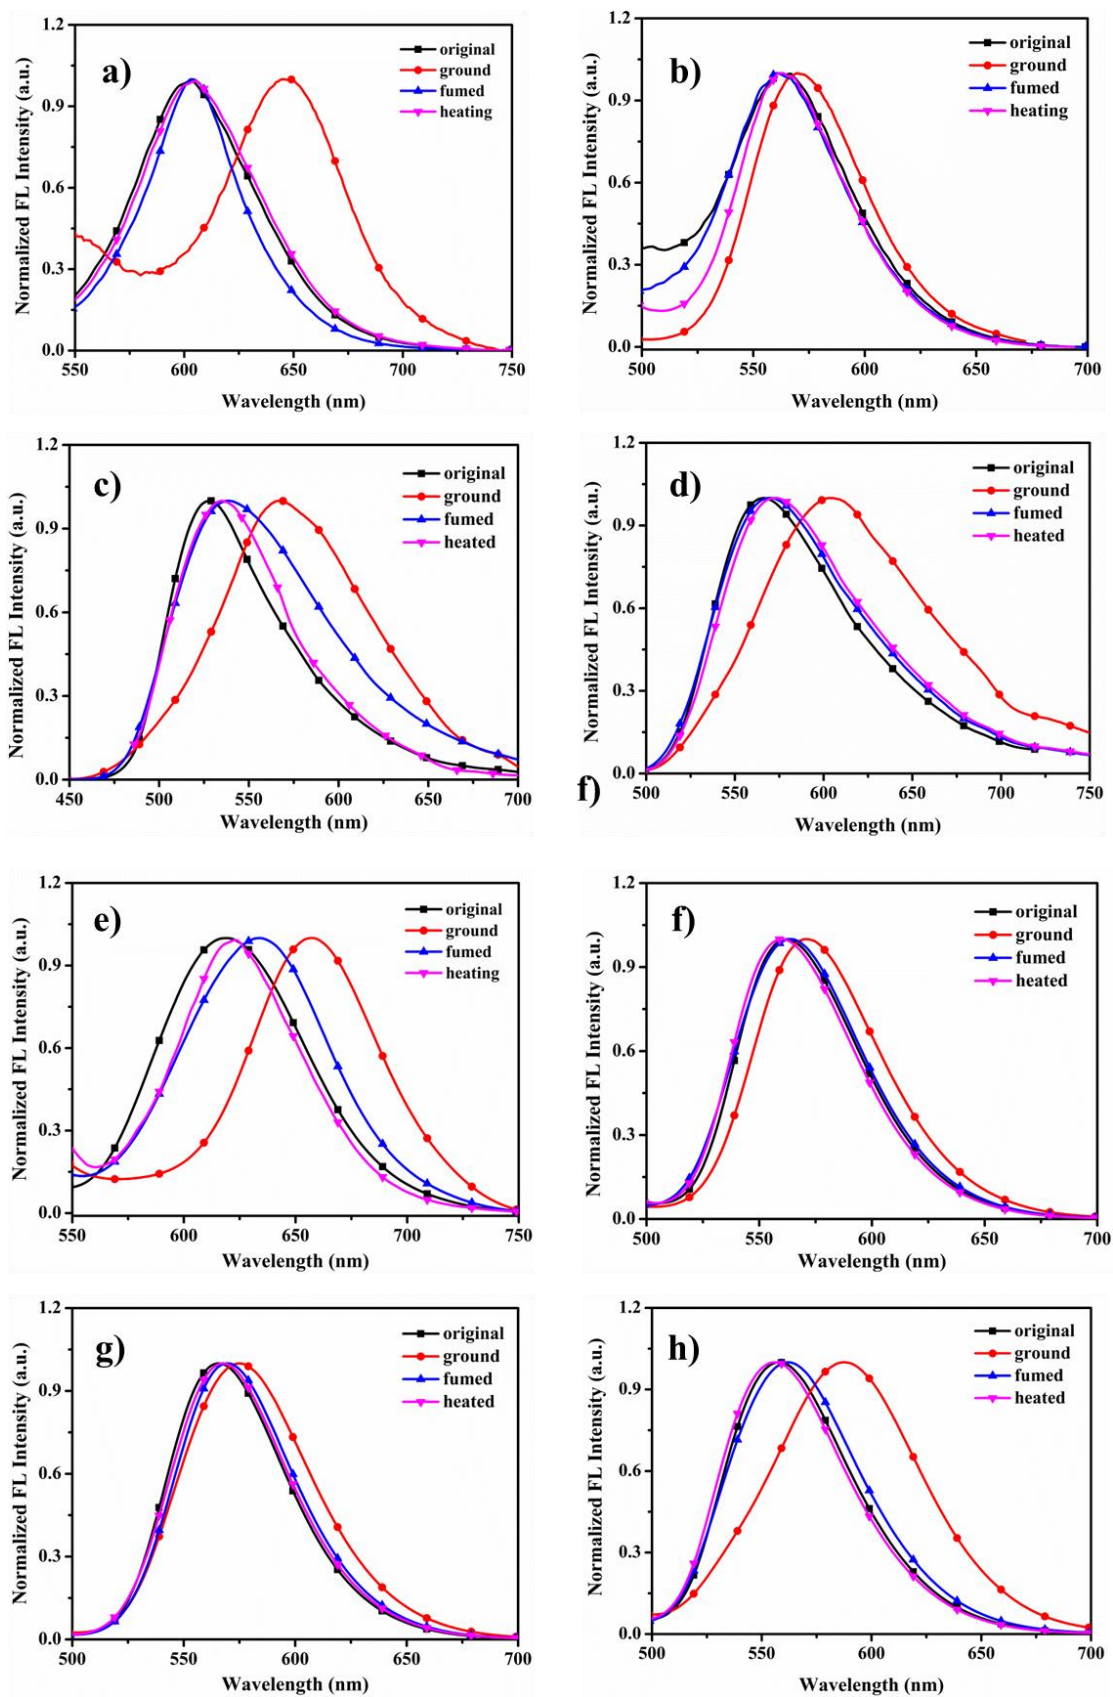

**Fig. S19** The fluorescence spectra of compounds **CZ-N~Br-CZ-CN** (a-h) under different treatments.

**Table S2** The fluorescence properties of these compounds in different solid states.

| Compounds                       | CZ-N | CZ-H | CZ-Br | CZ-CN | Br-CZ-N | Br-CZ-H | Br-CZ-Br | Br-CZ-CN |
|---------------------------------|------|------|-------|-------|---------|---------|----------|----------|
| $\lambda_{em}^{[a]}$ (nm)       | 603  | 568  | 528   | 553   | 618     | 561     | 565      | 558      |
| $\lambda_{em}^{[b]}$ (nm)       | 647  | 565  | 580   | 605   | 658     | 570     | 575      | 588      |
| $\lambda_{em}^{[c]}$ (nm)       | 603  | 566  | 538   | 553   | 634     | 561     | 569      | 558      |
| $\lambda_{em}^{[d]}$ (nm)       | 603  | 566  | 536   | 554   | 625     | 561     | 568      | 558      |
| $\Delta\lambda_{em}^{[e]}$ (nm) | 44   | 9    | 52    | 52    | 40      | 9       | 10       | 30       |

The maximum emission peaks of original samples<sup>[a]</sup>, ground samples<sup>[b]</sup>, fumed samples<sup>[c]</sup> and heated samples<sup>[d]</sup>;  $\Delta\lambda_{em}^{[e]} = \lambda_{em}^{[b]} - \lambda_{em}^{[a]}$ .

**Table S3** The fluorescence lifetime of these compounds in different states.

| Compounds                 | $\tau_1^a$ (ns) | $\tau_2^a$ (ns) | $\tau_3^a$ (ns) | $A_1^b$ | $A_2^b$ | $A_3^b$ | $\chi^2$ | $\langle\tau\rangle^c$ (ns) |
|---------------------------|-----------------|-----------------|-----------------|---------|---------|---------|----------|-----------------------------|
| CZ-N <sub>original</sub>  | 0.41            | 1.16            | 2.66            | 0.70    | 0.27    | 0.03    | 1.02     | 0.67                        |
| CZ-N <sub>ground</sub>    | 1.51            | 0.21            | 4.52            | 0.26    | 0.69    | 0.05    | 1.73     | 0.77                        |
| CZ-H <sub>original</sub>  | 0.11            | 0.75            | -               | 0.97    | 0.03    | -       | 1.27     | 0.13                        |
| CZ-H <sub>ground</sub>    | 0.26            | 0.68            | 2.28            | 0.74    | 0.25    | 0.02    | 1.44     | 0.39                        |
| CZ-Br <sub>original</sub> | 0.33            | 1.56            | 4.06            | 0.61    | 0.35    | 0.04    | 1.13     | 0.91                        |
| CZ-Br <sub>ground</sub>   | 0.70            | 1.53            | 7.57            | 0.62    | 0.37    | 0.01    | 1.17     | 1.07                        |
| CZ-CN <sub>original</sub> | 2.40            | 0.38            | 5.31            | 0.28    | 0.68    | 0.04    | 1.54     | 1.14                        |
| CZ-CN <sub>ground</sub>   | 0.83            | 2.17            | 10.84           | 0.07    | 0.92    | 0.01    | 1.38     | 2.16                        |

<sup>a</sup> Fluorescence lifetime. <sup>b</sup> Proportion. <sup>c</sup> Average life time  $\langle\tau\rangle = (A_1\tau_1 + A_2\tau_2 + A_3\tau_3)/(A_1 + A_2 + A_3)$ .

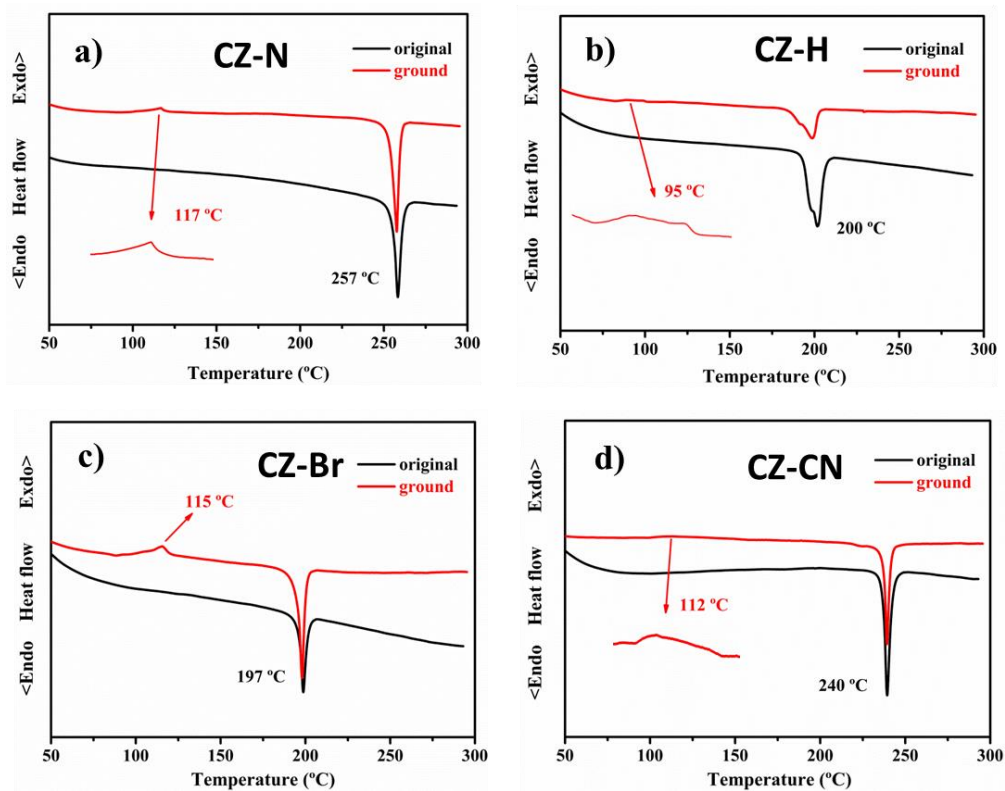

**Fig. S20** DSC curves of compounds CZ-N ~ CZ-CN in the original and ground states.

### <sup>1</sup>H NMR data of compound CZ-N

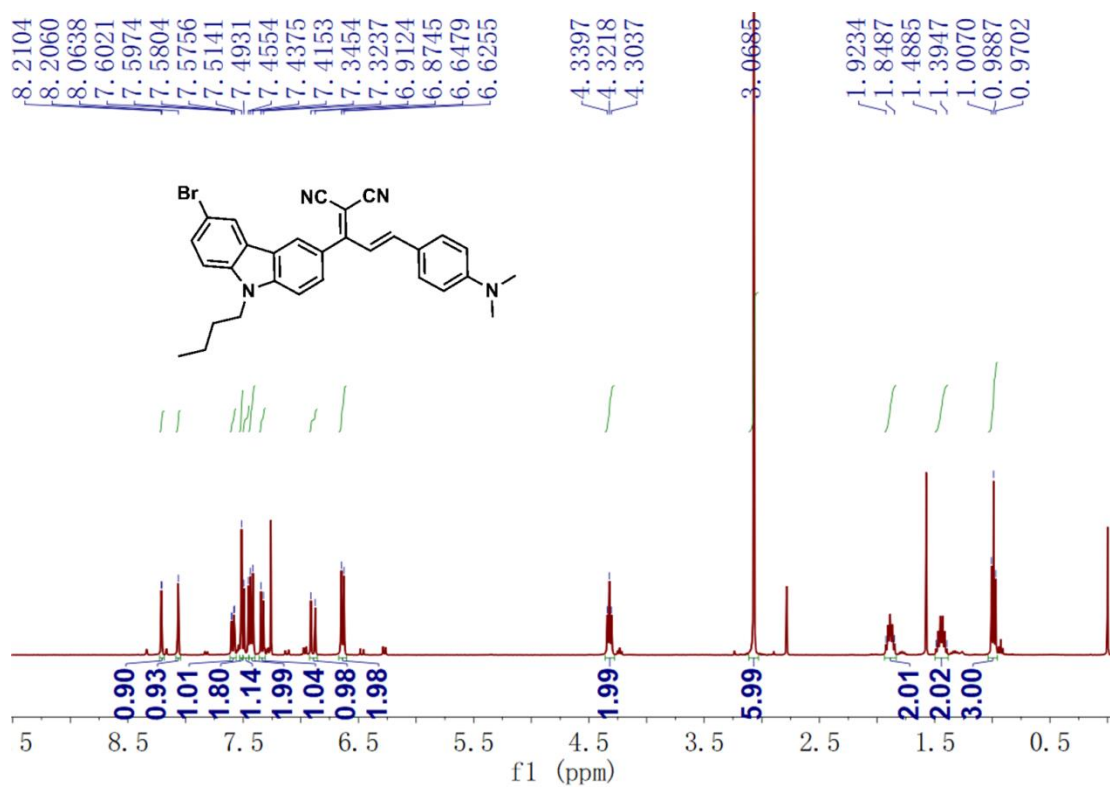

### <sup>13</sup>C NMR data of compound CZ-N

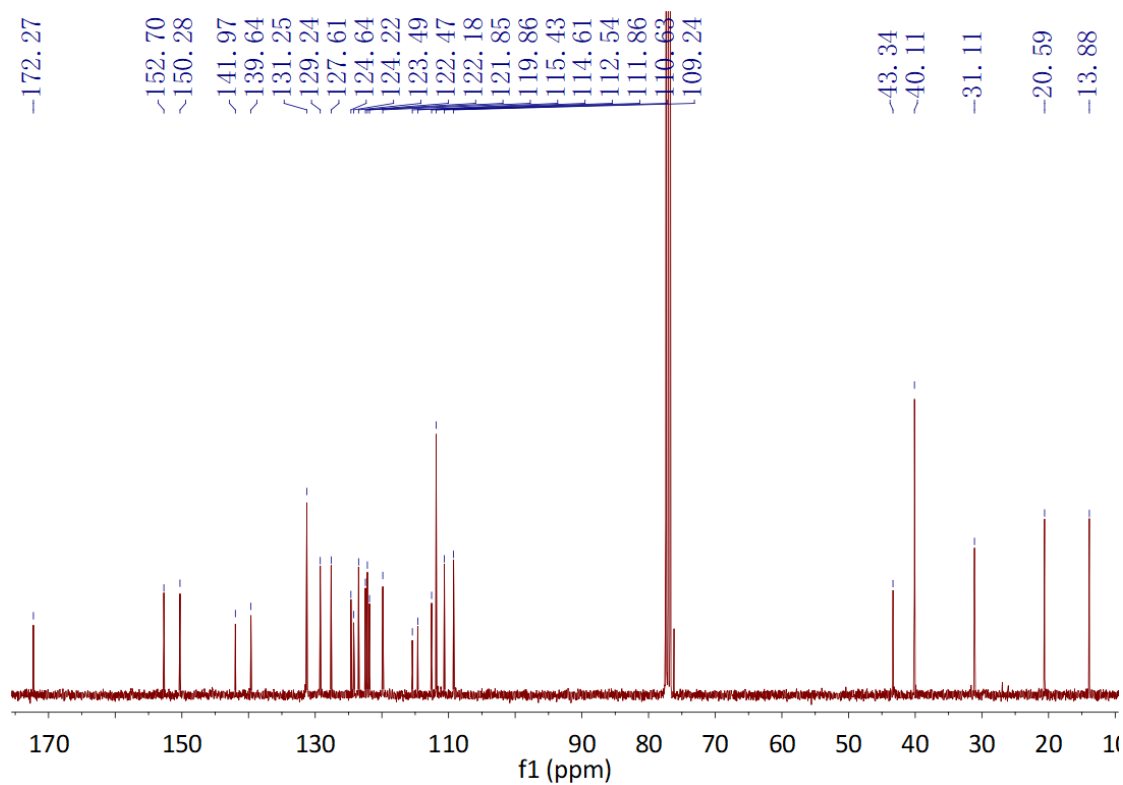

<sup>1</sup>H NMR data of compound **CZ-H**

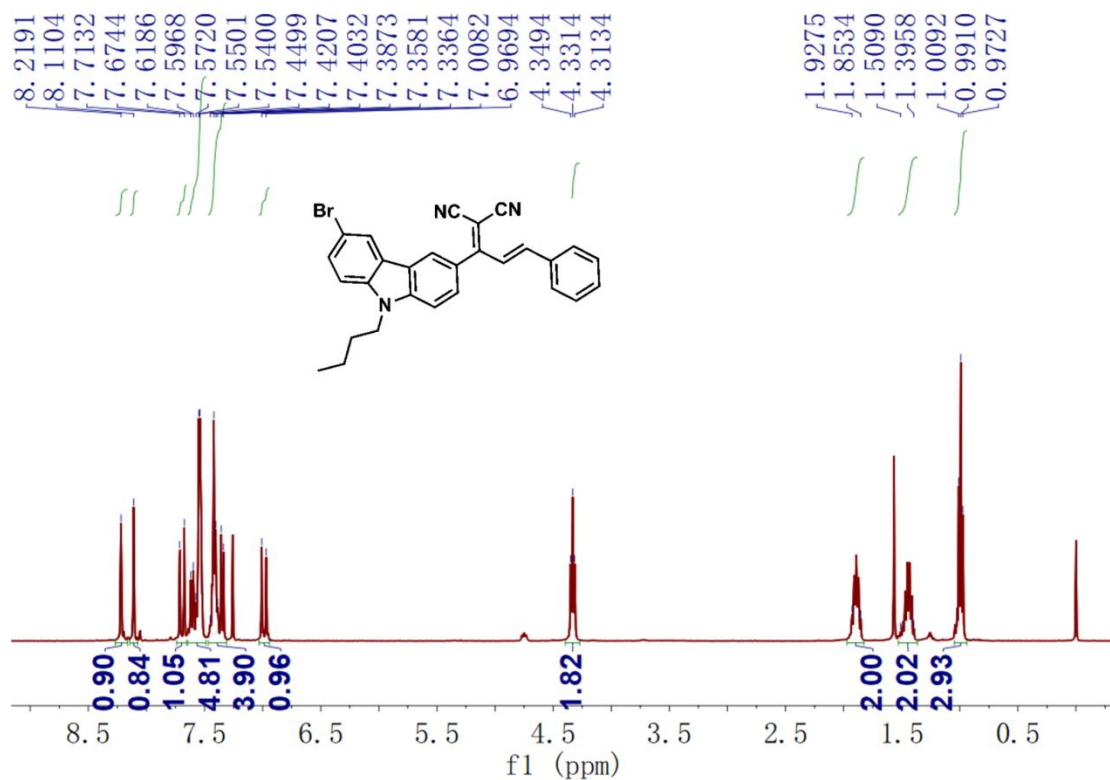

<sup>13</sup>C NMR data of compound **CZ-H**

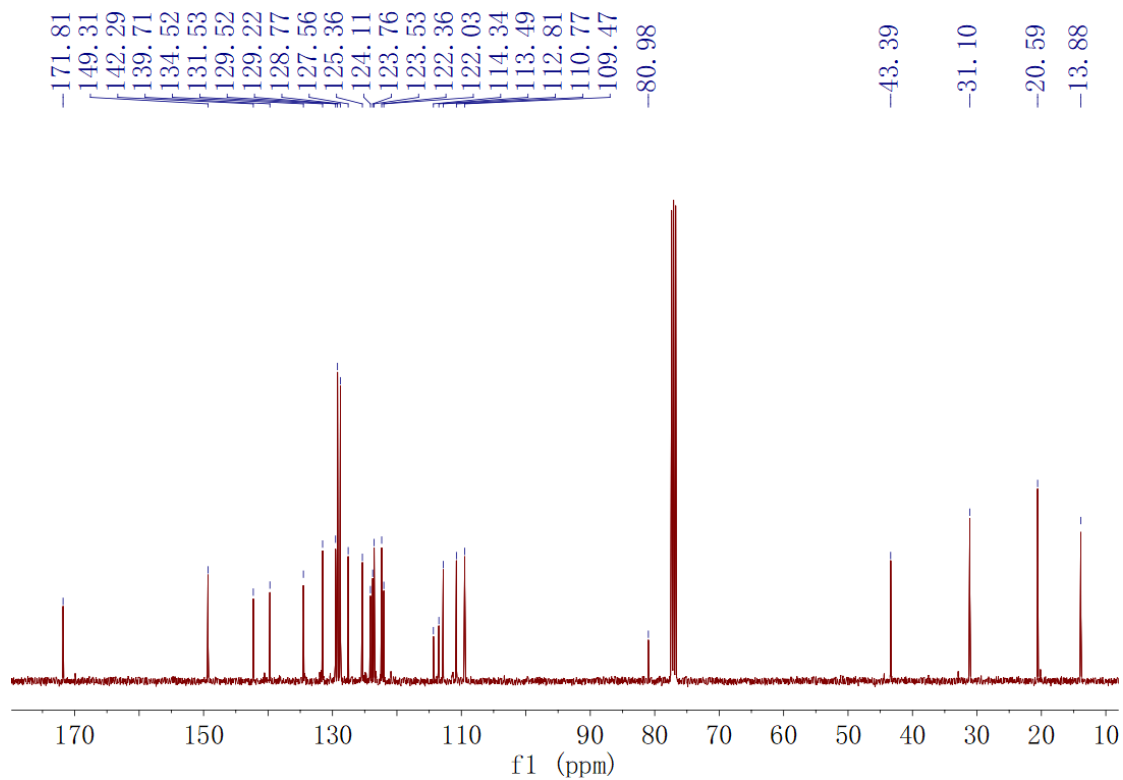

<sup>1</sup>H NMR data of compound **CZ-Br**

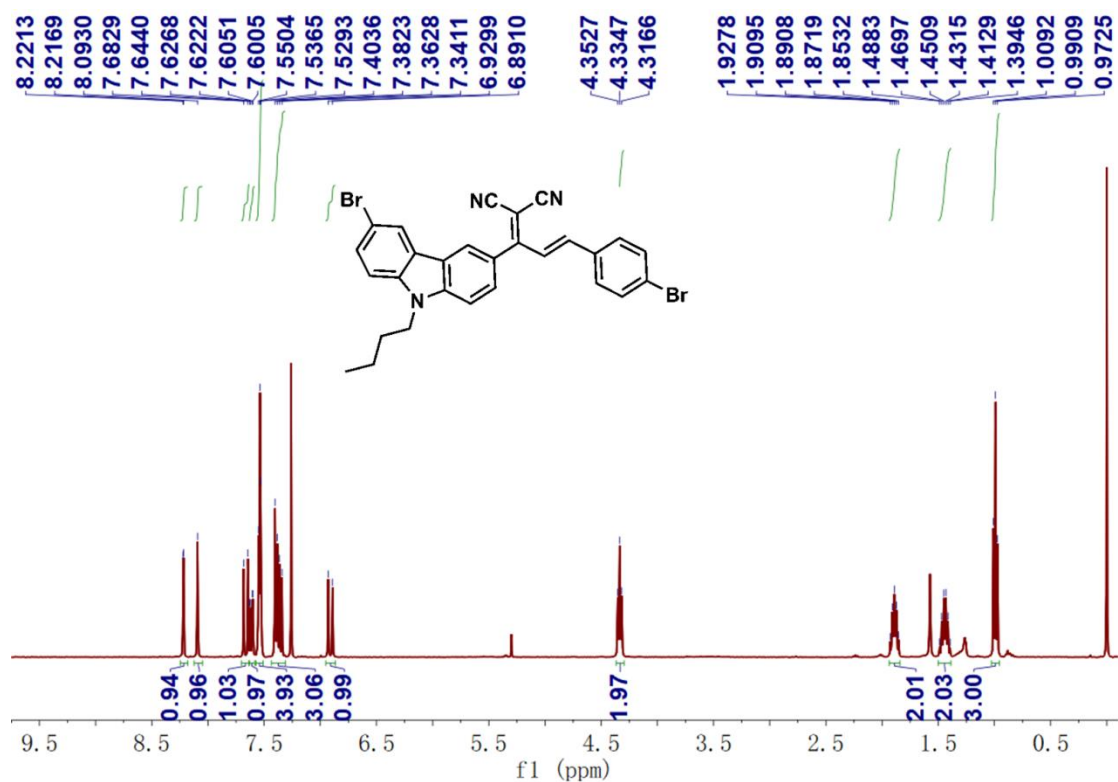

<sup>13</sup>C NMR data of compound **CZ-Br**

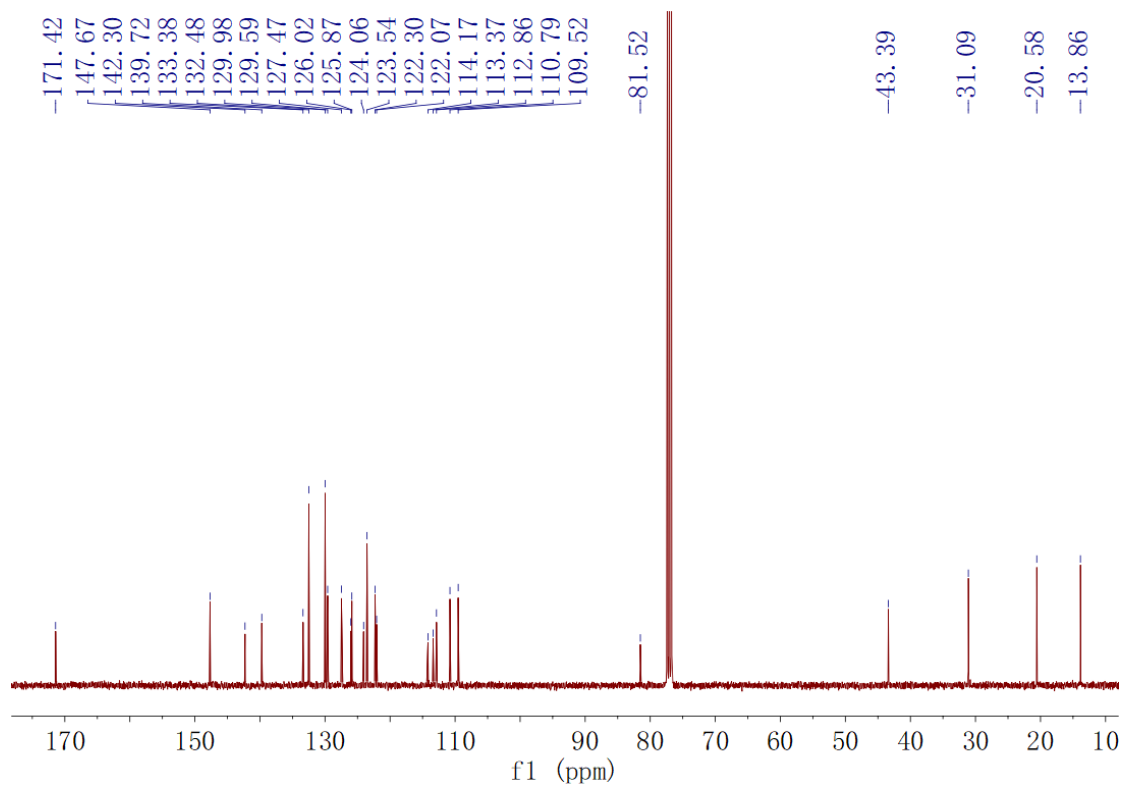

<sup>1</sup>H NMR data of compound **CZ-CN**

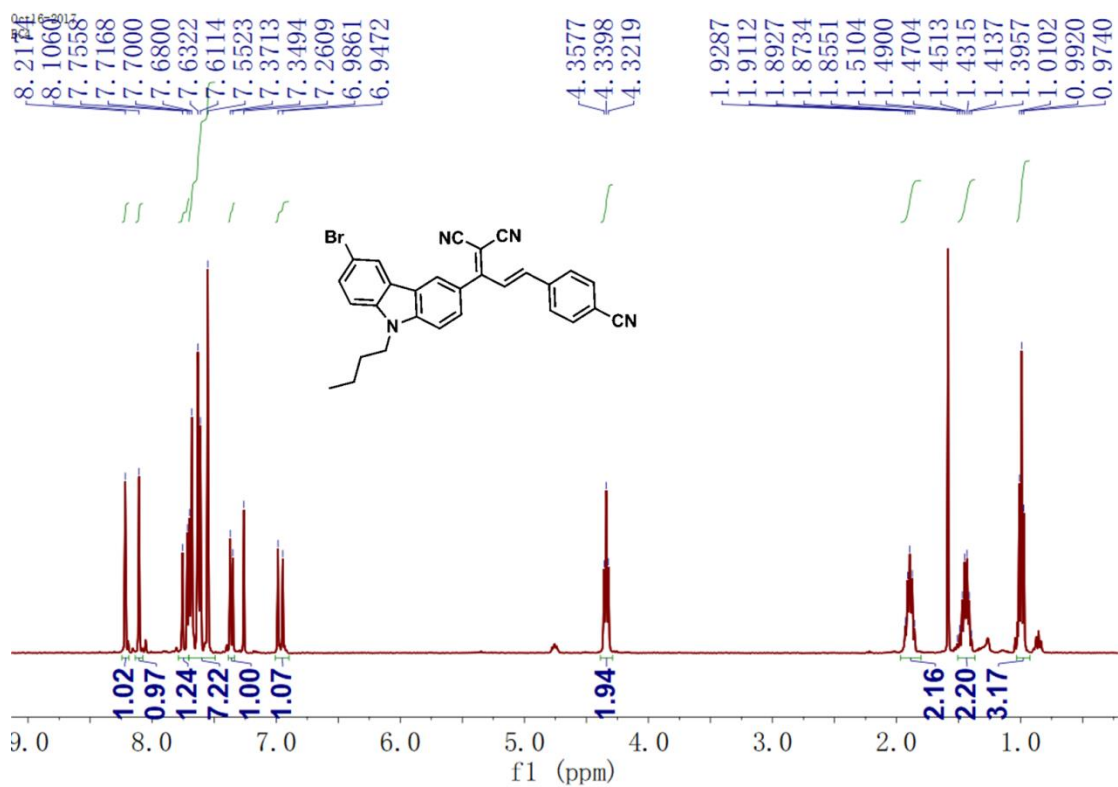

<sup>13</sup>C NMR data of compound **CZ-CN**

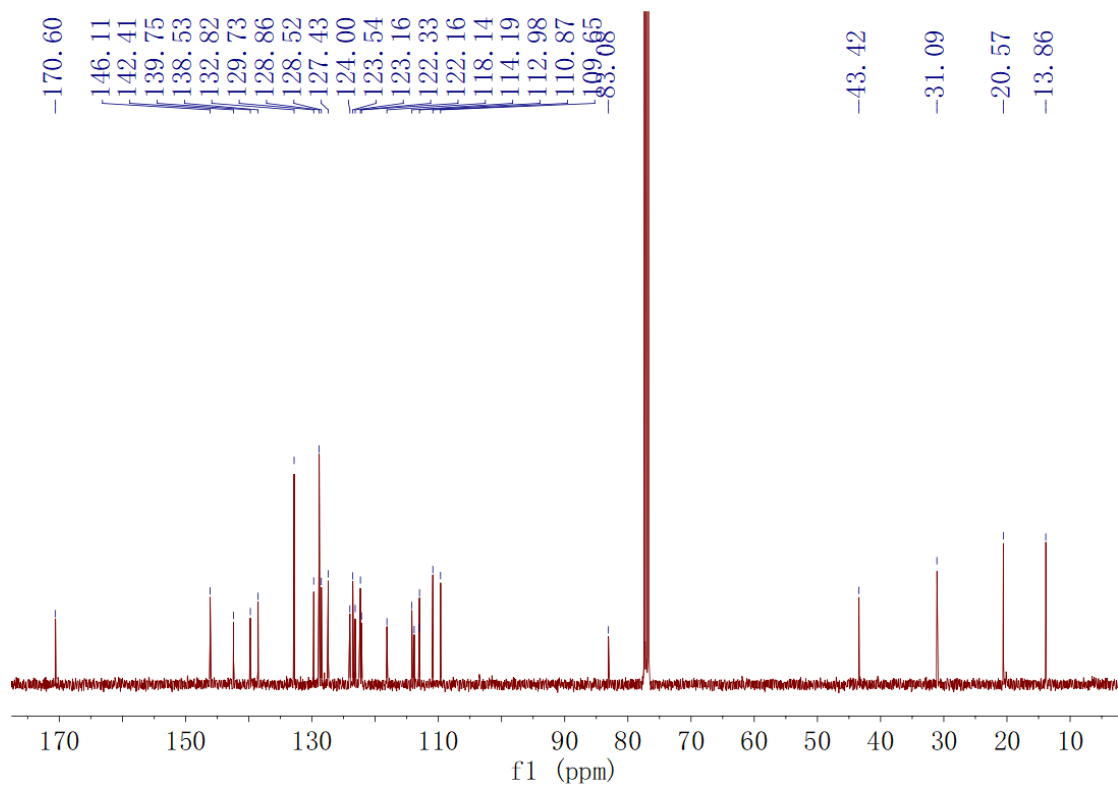

<sup>1</sup>H NMR data of compound **Br-CZ-N**

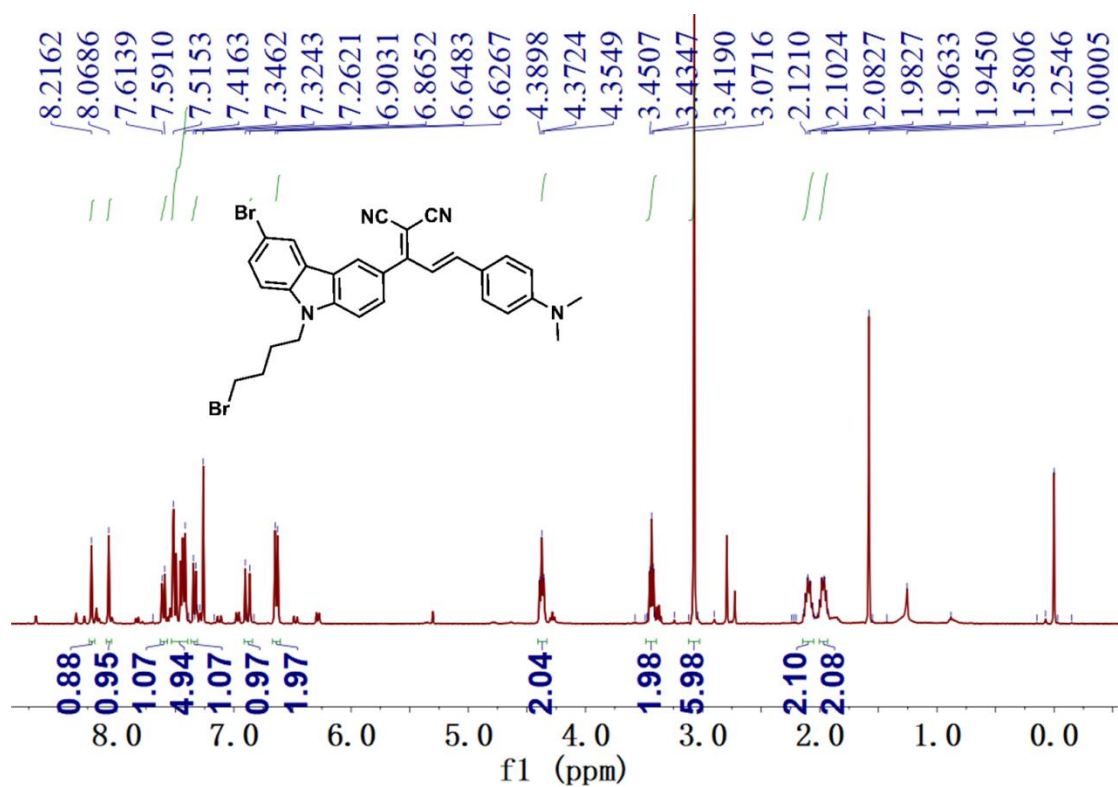

<sup>13</sup>C NMR data of compound **Br-CZ-N**

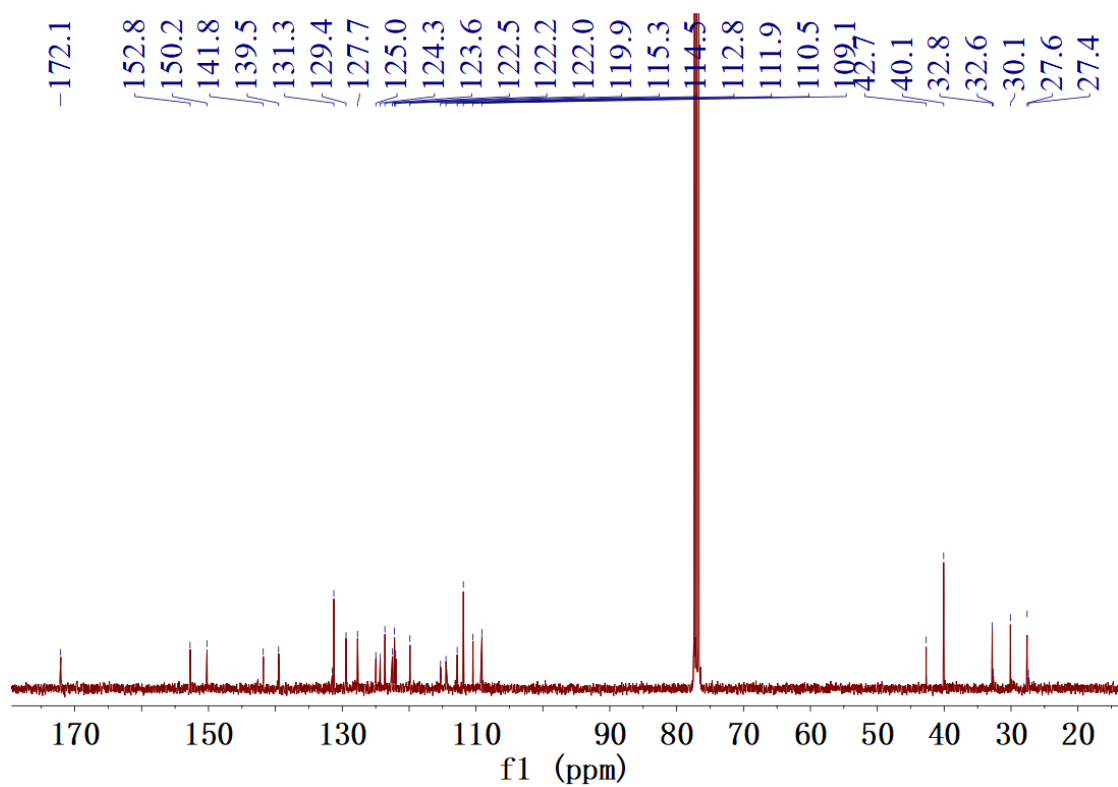



<sup>1</sup>H NMR data of compound **Br-CZ-H**

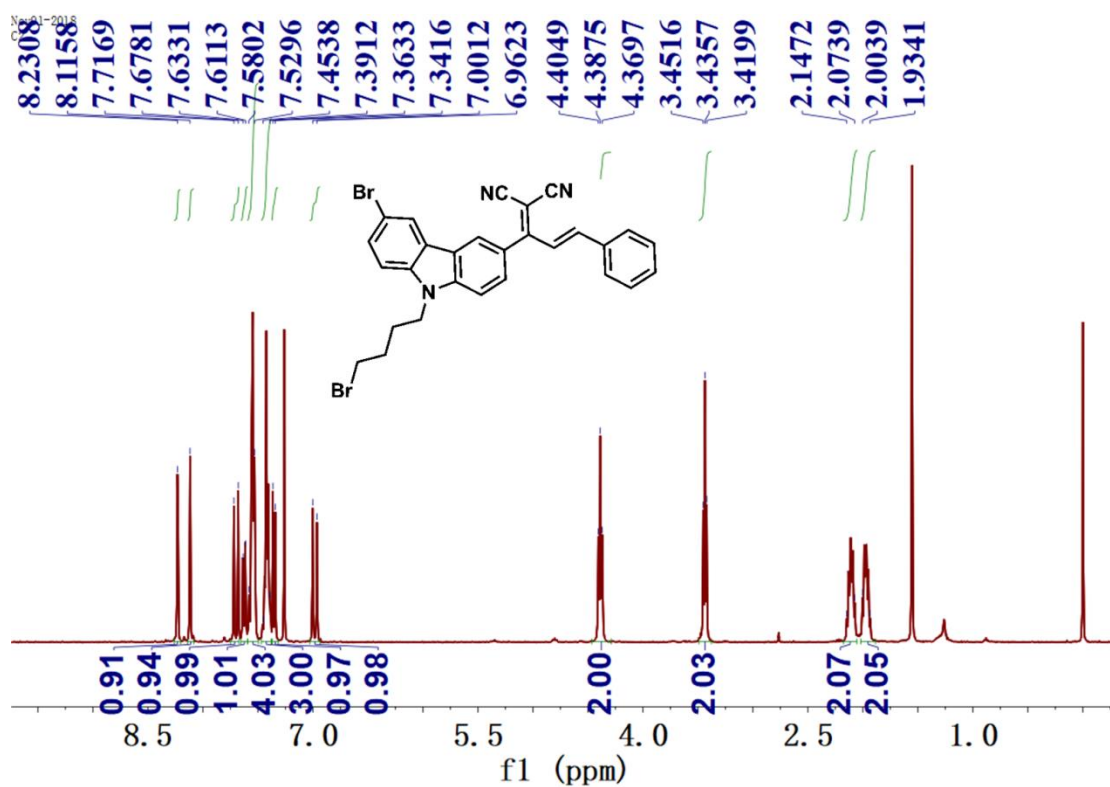

<sup>13</sup>C NMR data of compound **Br-CZ-H**

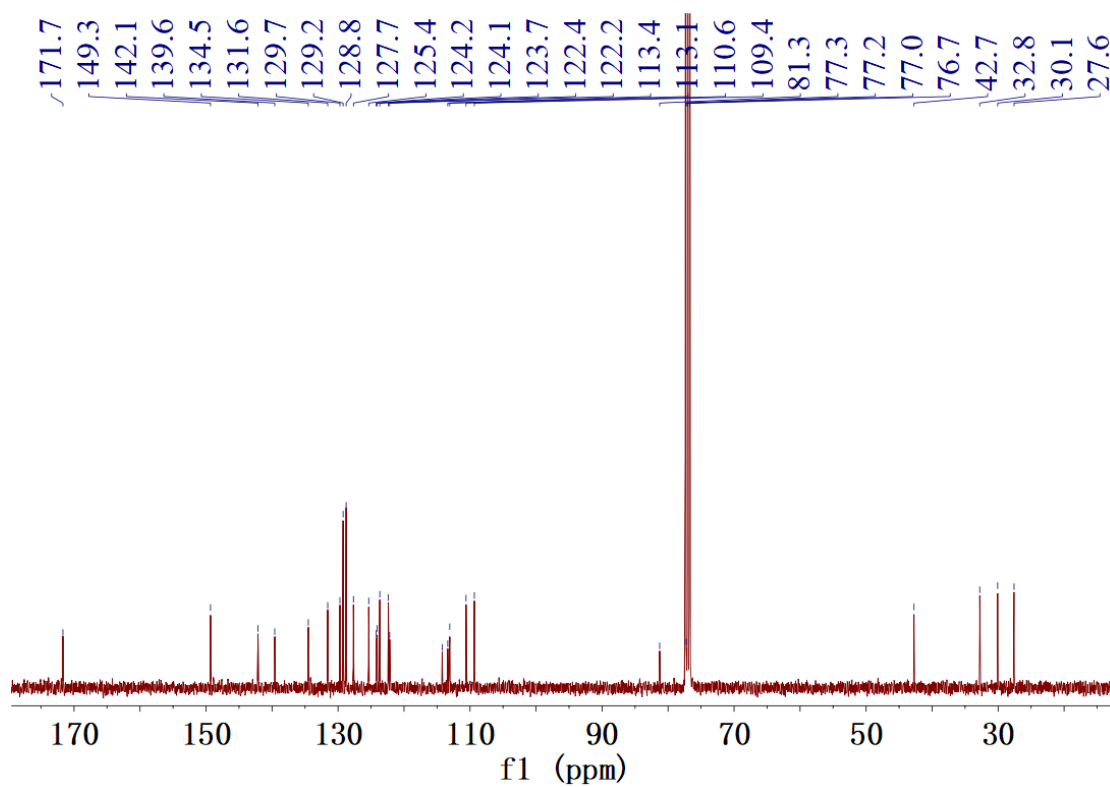

<sup>1</sup>H NMR data of compound **Br-CZ-Br**

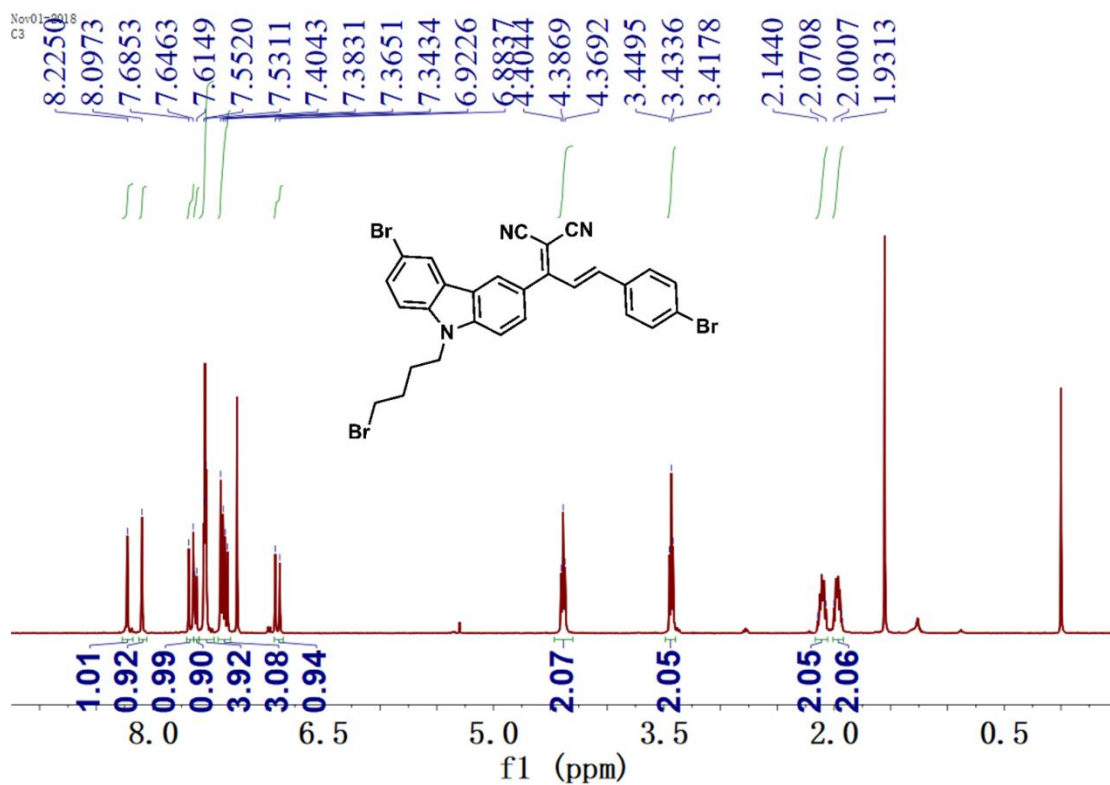

<sup>13</sup>C NMR data of compound **Br-CZ-Br**

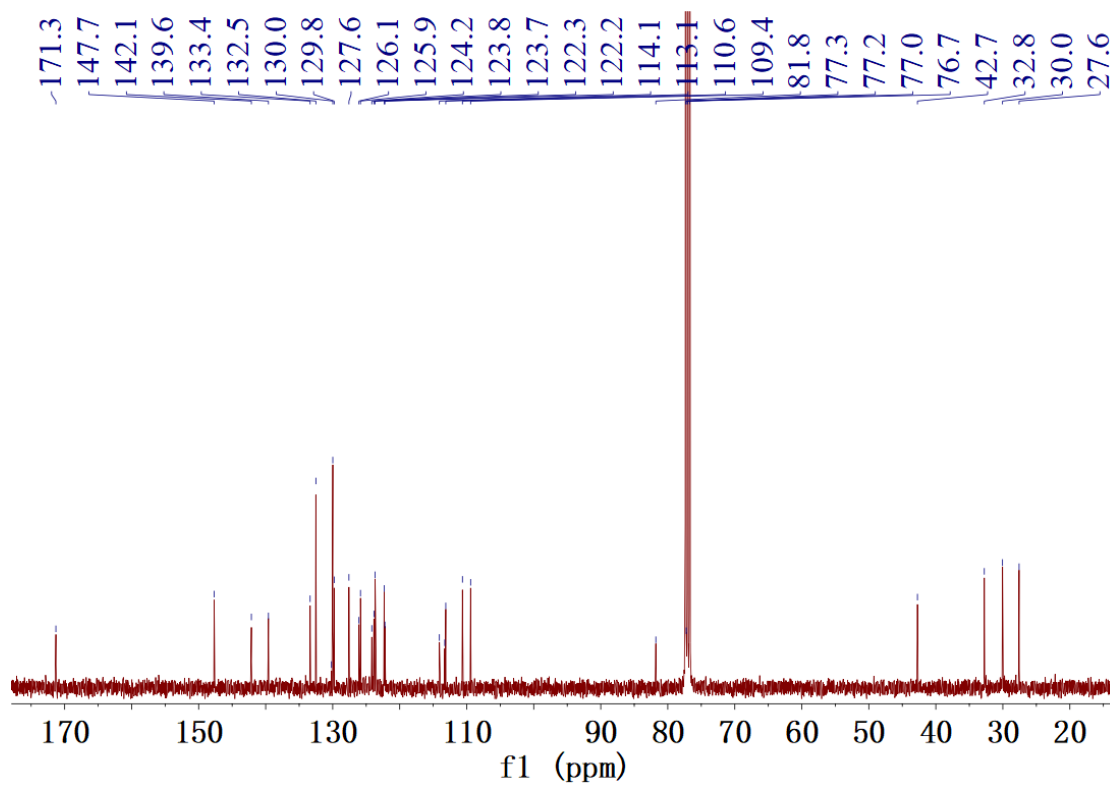

<sup>1</sup>H NMR data of compound **Br-CZ-CN**

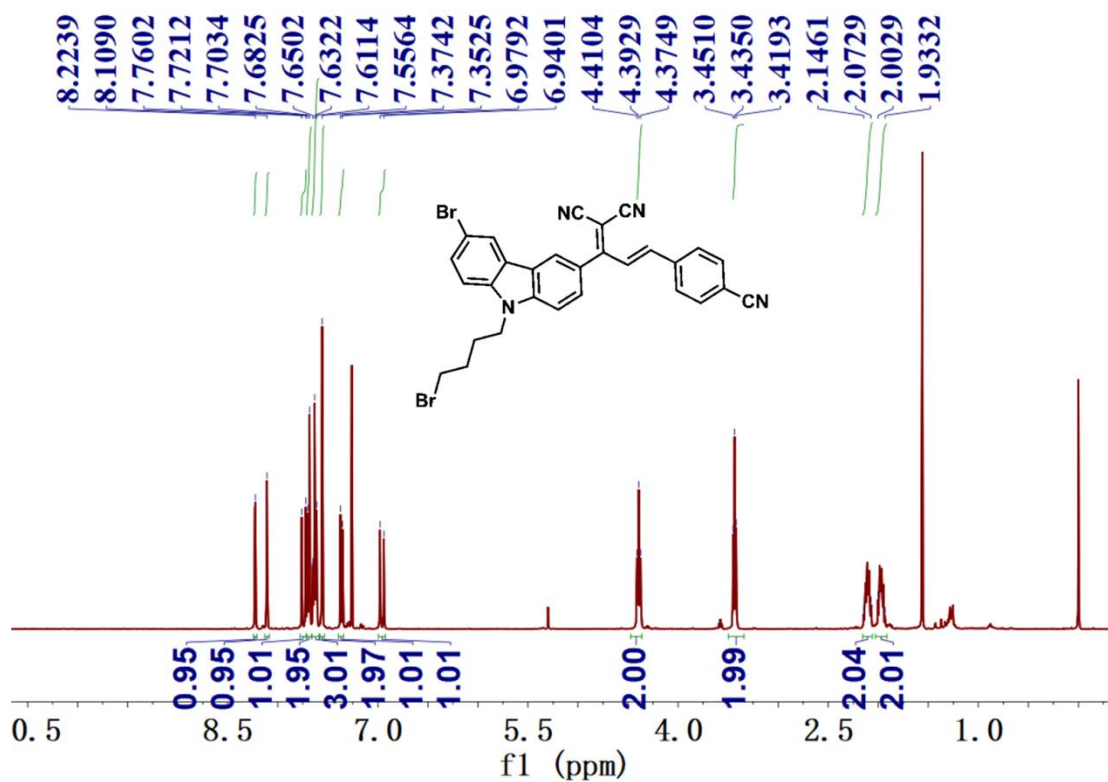

<sup>13</sup>C NMR data of compound **Br-CZ-CN**

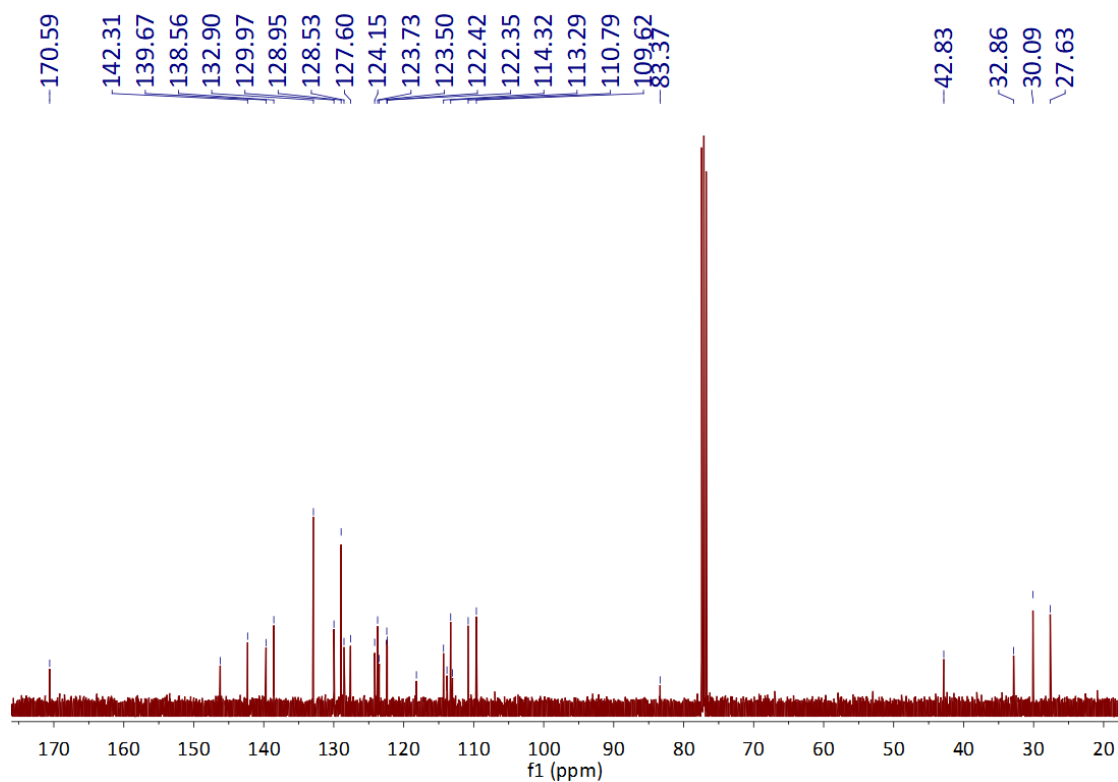

Supplement: d1ce00012h1.pdf [file d1ce00012h1.pdf]
